# Supplementary material for: Long working hours and risk of 50 health conditions and mortality outcomes: a multicohort study in four European countries
Source: PubMed Central journal article supplement — Lancet Reg Health Eur. 2021 Sep 6;11:100212. doi: 10.1016/j.lanepe.2021.100212 (PMC8642716; doi:10.1016/j.lanepe.2021.100212), 2021-09-06
Supplement: mmc1.pdf [file mmc1.pdf]

## Web appendices

### Contents

|                                                                                                                     |    |
|---------------------------------------------------------------------------------------------------------------------|----|
| Web appendix 1: List of morbidity outcomes .....                                                                    | 2  |
| Web appendix 2: Description of the cohort studies in primary analyses .....                                         | 4  |
| Web appendix 3: Description of the cohort studies in replication analyses .....                                     | 7  |
| Web appendix 4: Tests of proportionality assumption and graphical illustrations where the assumption is not met.... | 12 |
| Web appendix 5: Statistical code .....                                                                              | 15 |
| Web appendix 6: Supplementary results to primary analysis .....                                                     | 23 |
| Web appendix 7: Sensitivity analysis with maximum follow-up .....                                                   | 37 |

## Web appendix 1: List of morbidity outcomes

**eTable 1.** ICD-10 codes used in the assessment of morbidity (52 outcomes) and mortality (4 outcomes). Disease cases were identified from linked electronic health records (hospital discharge, death or entitlement for drug reimbursement registry). ICD-10 chapters and codes of diseases that were included in this analysis are described below.

| ICD-10 Chapter | ICD-10 code                                   | Data source<br>(1=hospitalization<br>and death;<br>2=drug<br>reimbursement<br>entitlement) | Baseline cases<br>excluded* |
|----------------|-----------------------------------------------|--------------------------------------------------------------------------------------------|-----------------------------|
| I              | <b>Infections</b>                             | A01-B89                                                                                    |                             |
|                | Bacterial infections                          | A01-A79                                                                                    |                             |
| II             | <b>Cancer</b>                                 | C00-C97                                                                                    | X                           |
|                | Melanoma                                      | C43-C44                                                                                    | X                           |
|                | Breast cancer                                 | C50                                                                                        | X                           |
|                | Prostate cancer                               | C61                                                                                        | X                           |
|                | Leukaemia, lymphoma                           | C810-C96                                                                                   | X                           |
| IV             | <b>Endocrine diseases</b>                     | E00-E90                                                                                    | X                           |
|                | Diabetes                                      | E10-E14                                                                                    | X                           |
| V              | <b>Mental and<br/>behavioural disorders</b>   | F00-F99                                                                                    | X                           |
|                | Disorders due to<br>substance abuse           | F10-F19                                                                                    | X                           |
|                | Psychotic disorders                           | F20-F29                                                                                    | X                           |
|                | Mood disorders                                | F30-F39                                                                                    | X                           |
| VI             | <b>Diseases of the<br/>nervous system</b>     | G00-G99                                                                                    | X                           |
|                | Epilepsy                                      | G40-G42                                                                                    | X                           |
|                | TIA                                           | G45-G46                                                                                    | X                           |
|                | Sleep disorders                               | G47                                                                                        | X                           |
| VII            | <b>Diseases of the eye</b>                    | H00-H59                                                                                    | X                           |
| VIII           | <b>Diseases of the ear</b>                    | H60-H99                                                                                    | X                           |
| IX             | <b>Diseases of the<br/>circulatory system</b> | I00-I99                                                                                    | X                           |
|                | Hypertension                                  | I10-I15                                                                                    | X                           |
|                | Ischemic heart diseases                       | I20-I25                                                                                    | X                           |
|                | Angina pectoris                               | I20                                                                                        | X                           |
|                | Myocardial infarction                         | I21                                                                                        | X                           |
|                | Arrhythmias                                   | I46-I49                                                                                    | X                           |
|                | Heart failure                                 | I50                                                                                        | X                           |
|                | Cerebrovascular<br>diseases                   | I60-I69                                                                                    | X                           |
|                | Stroke                                        | I60-I61, I63-I64                                                                           | X                           |
|                | Cerebral infarction                           | I63                                                                                        | X                           |
|                | Deep vein thrombosis                          | I80-I82                                                                                    |                             |
| X              | <b>Diseases of the<br/>respiratory system</b> | J00-J99                                                                                    | X                           |

|       |                                                                                                |                              |     |   |
|-------|------------------------------------------------------------------------------------------------|------------------------------|-----|---|
|       | Influenza and pneumonia                                                                        | J09-J18                      | 1   |   |
|       | Chronic obstructive bronchitis                                                                 | J43-J44, J47                 | 1,2 | X |
|       | Asthma                                                                                         | J45-J46                      | 1,2 | X |
| XI    | <b>Diseases of the digestive system</b>                                                        | K00-K93                      | 1   | X |
|       | Appendicitis                                                                                   | K35                          | 1   |   |
|       | Inflammatory bowel disease                                                                     | K50-K52                      | 1,2 | X |
|       | Diseases of liver                                                                              | K70-K77                      | 1,2 |   |
| XII   | <b>Diseases of the skin</b>                                                                    | L00-L99                      | 1   | X |
| XIII  | <b>Diseases of the musculoskeletal system</b>                                                  | M00-M99                      | 1   | X |
|       | Rheumatoid arthritis and related                                                               | M05-M06, M08,13, M30-35, M45 | 1,2 | X |
|       | Osteoarthritis                                                                                 | M15-M19                      | 1   |   |
|       | Sciatica                                                                                       | M50-M51                      | 1   |   |
|       | Back pain                                                                                      | M54                          | 1   |   |
|       | Soft tissue disorders                                                                          | M60-M79                      | 1   |   |
| XIV   | <b>Diseases of the genitourinary system</b>                                                    | N00-N99                      | 1   | X |
| XV    | <b>Pregnancy complications</b>                                                                 | O00-O03, O05-O29             | 1   | X |
| XVIII | <b>Symptoms, signs and abnormal clinical and laboratory findings, not elsewhere classified</b> |                              | 1   |   |
|       | Circulatory and respiratory symptoms                                                           | R00-R09                      | 1   |   |
|       | Digestive and abdominal symptoms                                                               | R10-R19                      | 1   |   |
| XIX   | <b>Injury and poisoning</b>                                                                    |                              | 1   |   |
|       | Injury                                                                                         | S00-T35                      | 1   |   |
| XX    | <b>External causes</b>                                                                         |                              | 1   |   |
|       | Road accidents                                                                                 | V01-V99                      | 1   |   |
|       | Falls                                                                                          | W00-W19                      | 1   |   |
|       | <b>Overall mortality</b>                                                                       |                              | 1   |   |
|       | Death, cancer                                                                                  | C00-C97                      | 1   |   |
|       | Death, CVD                                                                                     | I20-I25, I60-I69             | 1   |   |
|       | Death, other reason                                                                            | EI C00-C97, I20-I25, I60-I69 | 1   |   |

---

\*Participants with a history of the disease at baseline were excluded from the analysis

## Web appendix 2: Description of the cohort studies in primary analyses

For primary analysis, we pooled individual-participant data from two Finnish prospective cohort studies: the Finnish Public Sector (FPS) study and the Health and Social Support (HeSSup) study.

### **Finnish Public Sector study (FPS)**

The Finnish Public Sector study is a prospective cohort study comprising the entire public sector personnel of 10 towns (municipalities) and 21 hospitals in the same geographical areas. Participants were individuals who had been employed in the study organisations for at least six months prior to data collection. The FPS comprised 44 635 men and women who responded to a survey conducted between March 1, 2000, and June 30, 2002 (response rate 68%); had data on working hours; and were linked to electronic health records until Dec 31, 2016, and to mortality records until Dec 31, 2018. Ethical approval was obtained from the ethics committee of the Helsinki and Uusimaa Hospital District. Participants' occupational titles from the employers' records (>1900 different five-digit occupational titles) were classified into high (upper non-manual including e.g. physicians, teachers); intermediate (lower non-manual, e.g. technicians, registered nurses); and low (manual, e.g. cleaners, maintenance workers) SES on the basis of Statistics Finland's occupational classification system. The most common occupations in the Finnish municipal sector are those related to health care, social services and education, representing nearly 50% of all occupational groups.

Self-reported height, weight, smoking status, alcohol consumption and physical activity were collected from the questionnaires. Alcohol consumption was based on the reported amounts of beer, wine or other mild alcoholic beverages and hard liquors. For each category, seven pre-defined answer alternatives were given and weekly consumption was estimated based on the responses. The weekly amount of walking, brisk walking, jogging or running was asked with the following categories "not at all", "less than half an hour", "approximately one hour", "2-3 hours" and "4 hours or more". Physical inactivity was defined as less than 0.5 hour of each (brisk walking, jogging or running) per week. The weekly amount of both moderate and vigorous activities was calculated for classifying moderate or optimal activity.

### **Health and Social Support (HeSSup) study**

The Health and Social Support (HeSSup) study is a prospective cohort study of a stratified random sample of the Finnish population in the following four age groups: 20–24, 30–34, 40–44, and 50–54. The participants were identified from the Finnish population register and posted an invitation to participate, along with a baseline questionnaire, in 1998. In the HeSSup study, the analytic sample comprised of men and women who responded to a survey conducted between June 7, 1998, and May 23, 2000 (response rate 40%) and had data on working hours, who were successfully linked to national hospitalisation up to Dec 31, 2012, and mortality registers up to Dec 31, 2015. Of the 25 898 individuals who responded to the questionnaire, 14 964 (6 745 men and 8 219 women aged 20 to 54) were in employment and had data on working hours and were thus eligible for the study. The Turku University Central Hospital Ethics Committee approved the study. SES was defined based on participant's highest educational achievement to high (higher education, university) intermediate (higher or lower secondary, eg college/vocational school), and low (primary education only).

Self-reported height, weight and smoking status were collected from the questionnaires. Physical activity and alcohol consumption were based on responses from the questionnaire. The weekly amount of walking, brisk walking, jogging or running was asked with the following categories "not at all", "less than half an hour", "approximately one hour", "2-3 hours" and "4 hours or more". Physical inactivity was defined as less than 0.5 hour of each (brisk walking, jogging or running) per week. The weekly amount of both moderate and vigorous activities was calculated for classifying moderate or optimal activity. Alcohol consumption was based on the reported amounts of beer, wine or other mild alcoholic

beverages and hard liquors. For each category, seven pre-defined answer alternatives were given and weekly consumption was estimated based on the responses.

### **Assessment of baseline lifestyle factors**

Lifestyle factors were body mass index (BMI) (calculated as weight in kilograms divided by height in meters squared), smoking, leisure-time physical activity, and alcohol consumption. The scoring system for each lifestyle factor was as follows:

- BMI: less than 18.5 (underweight) 18.5 to 24.9 (normal), 25.0 to 29.9 (overweight), and greater than or equal to 30.0 (obese).
- Smoking: never and former smokers vs. and current smokers.
- Physical inactivity: Meeting the World Health Organization recommendations ( $\geq 2.5$  hours of moderate activity/week or  $\geq 1.25$  hours of vigorous activity/week: optimal), or partly meeting the recommendations (activity levels falling between the optimal and poor levels) vs. no or very little moderate/vigorous leisure-time physical activity.
- Alcohol consumption (total number of alcoholic drinks a participant consumed in a week; 1 drink being equivalent to approximately 10 g of ethanol): 0 drinks per week (no alcohol); 1 to 12 (women) or 1 to 24 (men) drinks per week (moderate); and greater than or equal to 13 (women) or greater than or equal to 25 (men) drinks per week (at-risk drinking).

We calculated BMI using height and weight (weight in kilograms divided by height in meters squared), which were self-reported (in FPS and HeSSup). Participants with BMI values  $<15$  or  $>50$  kg/m<sup>2</sup> as probable outliers or erroneous values, were excluded from the analyses.

**eTable 2.** Baseline characteristics of the study population by category of weekly working hours in primary analysis. Figures are numbers (column percentages).

|                                          | <35 h/wk       | 35-40 h/wk      | 41-48 h/wk     | 49-54 h/wk     | ≥55 h/wk       | P for ≥55h vs 35-40h/week | P for heterogeneity |
|------------------------------------------|----------------|-----------------|----------------|----------------|----------------|---------------------------|---------------------|
| <b>Study</b>                             |                |                 |                |                |                |                           |                     |
| FPS                                      | 3586<br>(69.1) | 31770<br>(79.6) | 6343<br>(69.6) | 1518<br>(57.6) | 1418<br>(51.6) |                           |                     |
| HeSSup                                   | 1606<br>(30.9) | 8135<br>(20.4)  | 2777<br>(30.4) | 1117<br>(42.4) | 1329<br>(48.4) | <0.001                    | <0.001              |
| <b>Sex</b>                               |                | 69.7            |                |                |                |                           |                     |
| Men                                      | 1041<br>(20.0) | 8086<br>(20.3)  | 3588<br>(39.3) | 1312<br>(49.8) | 1486<br>(54.1) |                           |                     |
| Women                                    | 4151<br>(80.0) | 31819<br>(79.7) | 5532<br>(60.7) | 1323<br>(50.2) | 1261<br>(45.9) | <0.001                    | <0.001              |
| <b>Age group, y</b>                      |                |                 |                |                |                |                           |                     |
| ≤50                                      | 3633<br>(70.0) | 27984<br>(70.1) | 6485<br>(71.1) | 1837<br>(69.7) | 1889<br>(68.8) |                           |                     |
| >50                                      | 1559<br>(30.0) | 11921<br>(29.9) | 2635<br>(28.9) | 798 (30.3)     | 858 (31.2)     | 0.13                      | 0.15                |
| <b>Socioeconomic status</b>              |                |                 |                |                |                |                           |                     |
| Low                                      | 646 (12.5)     | 8388<br>(21.0)  | 1299<br>(14.3) | 413 (15.7)     | 651 (23.8)     |                           |                     |
| High                                     | 4538<br>(87.5) | 31479<br>(79.0) | 7814<br>(85.7) | 2213<br>(84.3) | 2089<br>(76.2) | <0.001                    | <0.001              |
| <b>Body mass index, kg/m<sup>2</sup></b> |                |                 |                |                |                |                           |                     |
| <18.5                                    | 104 (2.1)      | 481 (1.3)       | 96 (1.1)       | 29 (1.1)       | 31 (1.2)       |                           |                     |
| 18.5 – 24.9                              | 3050<br>(60.8) | 21551<br>(55.8) | 4722<br>(53.3) | 1318<br>(51.5) | 1269<br>(47.7) |                           |                     |
| 25.0 – 29.9                              | 1418<br>(28.3) | 12199<br>(31.6) | 3040<br>(34.3) | 934 (36.5)     | 1002<br>(37.7) |                           |                     |
| ≥30                                      | 443 (8.8)      | 4375<br>(11.3)  | 1001<br>(11.3) | 279 (10.9)     | 356 (13.4)     | <0.001                    | <0.001              |
| <b>Current smoking</b>                   |                |                 |                |                |                |                           |                     |
| No                                       | 4259<br>(84.0) | 30855<br>(80.1) | 7047<br>(80.1) | 2011<br>(79.8) | 2004<br>(76.0) |                           |                     |
| Yes                                      | 808 (16.0)     | 7519<br>(19.6)  | 1748<br>(19.9) | 510 (20.2)     | 633 (24.0)     | <0.001                    | <0.001              |
| <b>Alcohol consumption</b>               |                |                 |                |                |                |                           |                     |
| None                                     | 733 (14.3)     | 5623<br>(14.4)  | 860 (9.6)      | 283 (11.0)     | 298 (11.1)     |                           |                     |
| Moderate                                 | 3902<br>(76.2) | 30359<br>(77.5) | 7236<br>(80.7) | 2058<br>(80.0) | 2117<br>(78.9) |                           |                     |
| Heavy                                    | 487 (9.5)      | 3203 (8.1)      | 873 (9.7)      | 232 (9.0)      | 267 (10.0)     | <0.001                    | <0.001              |
| <b>Physical activity</b>                 |                |                 |                |                |                |                           |                     |
| Inactive                                 | 4069<br>(80.2) | 31274<br>(80.1) | 7173<br>(80.3) | 1993<br>(78.0) | 2011<br>(75.6) |                           |                     |
| Active                                   | 1007<br>(19.8) | 7756<br>(19.9)  | 1758<br>(19.7) | 561 (22.0)     | 649 (24.4)     | <0.001                    | <0.001              |

## Web appendix 3: Description of the cohort studies in replication analyses

### **The Whitehall II study**

The Whitehall II study is a prospective cohort study set up to investigate socioeconomic determinants of health. At study baseline in 1985-1988, 10 308 civil service employees (6 895 men and 3 413 women) aged 35-55 and working in 20 civil service departments in London were invited to participate in the study. The Whitehall II comprises 7650 government workers who responded to a survey on working hours between Aug 7, 1991, and May 10, 1993 (response rate 74%) and were linked electronically to national hospitalization and mortality registers from Jan 1, 1997 (when these records achieved a high level of national coverage) to March 31, 2017. The Whitehall II study protocol was approved by the University College London Medical School committee on the ethics of human research. Written informed consent was obtained at each data collection wave. SES was assessed using civil service occupation-based employment grade categories: high (Administrative grades 1 to 7), intermediate (Professional and Executive grades including senior executive officers, higher executive officers and executive officers) and low (clerical grades including office support staff).

### **Swedish Longitudinal Occupational Survey of Health (SLOSH)**

The SLOSH is an on-going prospective cohort study following up individuals who participated in the Swedish Work Environment Survey (SWES) in 2003 or 2005. SWES, conducted biennially by Statistics Sweden, is based on a sample of gainfully employed people aged 16-64 years drawn from the Labour Force Survey (LFS). These individuals were first sampled into LFS through stratification by county, sex, citizenship and inferred employment status. Data from the 2008 data collection wave of SLOSH were used in the replication analyses. The data were collected using postal self-completion questionnaires (response rate 61%). SLOSH has been approved by the Regional Research Ethics Board in Stockholm. The SLOSH comprises 9081 Swedish workers who responded to a survey on working hours between April 21, 2008 and November 5, 2008 and were linked electronically to national hospitalization and mortality registers from Jan 1, 1997 to Dec 31, 2018 (for mortality records until Dec 31, 2020).

### **Work, Lipids and Fibrinogen (WOLF) study (two cohorts)**

WOLF Stockholm is a prospective cohort study of 5 560 people aged 19-70 and working in companies in Stockholm county. The WOLF Norrland is a prospective cohort of 4671 participants aged 19-65 working in companies in Jämtland and Västernorrland counties. Thus, the combined WOLF comprises 10231 workers (response rate 79%). At study baseline the participants underwent a clinical examination and completed a set of health questionnaires. For WOLF Stockholm, the baseline assessment was undertaken at 20 occupational health units between November 1992 and June 1995 and for WOLF Norrland at 13 occupational health service units in 1996-98. The Regional Research Ethics Board in Stockholm, and the ethics committee at Karolinska Institutet, Stockholm, Sweden approved the study. The average follow-up time was 14 years.

### **Danish Work Environment Cohort (DWECS) study (two cohorts)**

The DWECS is a split panel survey of working age Danish people. The cohort for DWECS-00 was established in 1990, when a simple random sample of men and women, aged 18-59, was drawn from the Danish population register. The participants have been followed up at five year intervals and data from the years 2000 and 2005 were used in this study. The DWECS-00 comprises 5467 people (2913 men and 2554 women, response rate 75%). In 2005, an additional independent random sample of 8545 individuals, DWECS-05, were invited to participate. A total of 4978 people (2398 men and 2580 women) agreed to do so and had data on relevant variables (58%). In Denmark, questionnaire- and register-based studies do not require ethics committee approval. DWECS was approved by and registered with the Danish Data protection agency (registration number: 2007-54-0059).

### **Copenhagen Psychosocial Questionnaire (COPSOQ) study (two cohorts)**

The COPSOQ study has also two independent subcohorts. The COPSOQ-I is a prospective cohort study of a random sample of Danish residents selected from the Danish population register. The participants were aged 20-60 years of age and were in paid employment at the study baseline in 1997. A baseline questionnaire and an invitation to take part was posted to 4 000 people and 2 454 individuals agreed to participate (response rate 61%), of which 1858 were gainfully employed. COPSOQ-II was carried out in 2004-2005. It included a follow up of respondents from COPSOQ I and a representative sample of Danish residents aged 20-60 at study baseline. The questionnaire was sent to 8 000 individuals and 4 732 individuals responded (response rate 59%). The questionnaire could be completed via post or via the internet. There were 3 817 gainfully employed first time participants who were successfully linked with register data. The COPSOQ-I comprises 1772 people, and the COPSOQ-II comprises 3387 people as the final

samples used in the analyses. In Denmark, questionnaire- and register-based studies do not require approval from the Danish National Committee on Biomedical Research Ethics (Den Centrale Videnskabetiske komité). COPSOQ-I and COPSOQ II were approved by and registered with the Danish Data protection agency (registration numbers: 2008 - 54 -15 0553, 2004-54-1493).

### **Burnout, Motivation, Job Satisfaction (PUMA) study**

PUMA is an intervention study of burn-out among employees in the human service sector. Selection criteria for the participating organisations was that they had between 200 and 500 employees, that occupational groups within each organisation were willing to participate and that the organisations would commit to the entire five-year study period. Participants gave consent to having their national identity numbers collected and used in later record linkages to Danish hospitalisation and cause of death registries (Hospitalsindlæggelsesregisteret, Dødsårsagsregisteret. At study baseline in 1999-2000, 1 914 participants agreed to take part (response rate 80%). The analytic sample used in replication analyses comprised 1834 people. PUMA was approved by the Scientific Ethical Committees (Videnskabsetisk Komiteer) in the counties in which the study was conducted and approved by and registered with the Danish Data Protection Agency (registration number: 2000-54-0048).

**eTable 3.** Baseline characteristics of the study population by category of weekly working hours in replication analysis. Figures are numbers (column percentages).

| Cohort    |                     | <35<br>h/wk    | 35-40<br>h/wk   | 41-48<br>h/wk  | 49-54<br>h/wk | ≥55<br>h/wk   | P for ≥55h vs 35-<br>40h/week |
|-----------|---------------------|----------------|-----------------|----------------|---------------|---------------|-------------------------------|
|           | <b>Sex</b>          |                |                 |                |               |               |                               |
| WHII      | Men                 | 208<br>(54.0)  | 2494<br>(63.2)  | 1155<br>(77.6) | 832<br>(77.1) | 639<br>(85.3) |                               |
|           | Women               | 177<br>(46.0)  | 1455<br>(36.8)  | 333<br>(22.4)  | 247<br>(22.9) | 110<br>(14.7) | <0.001                        |
| SLOSH     | Men                 | 542<br>(28.7)  | 1425<br>(44.34) | 1121<br>(52.8) | 565<br>(60.4) | 557<br>(60.4) |                               |
|           | Women               | 1346<br>(71.3) | 1789<br>(55.7)  | 1000<br>(47.2) | 371<br>(39.6) | 365<br>(39.6) | <0.001                        |
| WOLF      | Men                 | 215<br>(28.1)  | 3608<br>(68.7)  | 2561<br>(75.9) | 449<br>(81.6) | 231<br>(80.5) |                               |
|           | Women               | 550<br>(71.9)  | 1646<br>(31.3)  | 814<br>(24.1)  | 101<br>(18.4) | 56<br>(19.5)  | <0.001                        |
| DWECS00   | Men                 | 162<br>(18.3)  | 1621<br>(53.4)  | 501<br>(63.6)  | 269<br>(81.5) | 360<br>(84.3) |                               |
|           | Women               | 723<br>(81.7)  | 1416<br>(46.6)  | 287<br>(36.4)  | 61<br>(18.5)  | 67<br>(15.7)  | <0.001                        |
| DWECS05   | Men                 | 205<br>(21.1)  | 1243<br>(47.9)  | 426<br>(59.3)  | 222<br>(72.1) | 302<br>(79.3) |                               |
|           | Women               | 769<br>(79.0)  | 1353<br>(52.1)  | 293<br>(40.8)  | 86<br>(27.9)  | 79<br>(20.7)  | <0.001                        |
| COPSOQ-I  | Men                 | 63<br>(17.6)   | 583<br>(55.5)   | 142<br>(68.3)  | 74<br>(85.1)  | 56<br>(82.4)  |                               |
|           | Women               | 296<br>(82.5)  | 467<br>(44.5)   | 66<br>(31.7)   | 13<br>(14.9)  | 12<br>(17.7)  | <0.001                        |
| COPSOQ-II | Men                 | 60<br>(11.1)   | 856<br>(48.0)   | 405<br>(59.9)  | 146<br>(69.2) | 144<br>(81.4) |                               |
|           | Women               | 481<br>(88.9)  | 926<br>(52.0)   | 271<br>(40.1)  | 65<br>(30.8)  | 33<br>(18.6)  | <0.001                        |
| PUMA      | Men                 | 15 (2.5)       | 225<br>(21.1)   | 45<br>(36.9)   | 20<br>(60.6)  | 10<br>(62.5)  |                               |
|           | Women               | 579<br>(97.5)  | 844<br>(79.0)   | 77<br>(63.1)   | 13<br>(39.4)  | 6<br>(37.5)   | <0.001                        |
|           | <b>Age group, y</b> |                |                 |                |               |               |                               |



|           |                             |               |                |                |               |               |        |
|-----------|-----------------------------|---------------|----------------|----------------|---------------|---------------|--------|
| WHII      | <=50                        | 139<br>(36.1) | 2353<br>(59.6) | 961<br>(64.6)  | 701<br>(65.0) | 496<br>(66.2) |        |
|           | >50                         | 246<br>(63.9) | 1596<br>(40.4) | 527<br>(35.4)  | 378<br>(35.0) | 253<br>(33.8) | <0.001 |
| SLOSH     | <=50                        | 919<br>(48.7) | 1852<br>(57.6) | 1193<br>(56.2) | 490<br>(52.4) | 462<br>(50.1) |        |
|           | >50                         | 969<br>(41.3) | 1362<br>(42.4) | 928<br>(43.8)  | 446<br>(47.6) | 460<br>(49.9) | 0.48   |
| WOLF      | <=50                        | 492<br>(64.3) | 3844<br>(73.2) | 2517<br>(74.6) | 423<br>(76.9) | 226<br>(78.8) |        |
|           | >50                         | 273<br>(35.7) | 1410<br>(26.8) | 858<br>(25.4)  | 127<br>(23.1) | 61<br>(21.3)  | 0.04   |
| DWECS00   | <=50                        | 586<br>(66.2) | 2290<br>(75.4) | 574<br>(72.8)  | 248<br>(75.2) | 313<br>(73.3) |        |
|           | >50                         | 299<br>(33.8) | 747<br>(24.6)  | 214<br>(27.2)  | 82<br>(24.9)  | 144<br>(26.7) | 0.35   |
| DWECS05   | <=50                        | 660<br>(67.8) | 1885<br>(72.6) | 527<br>(73.3)  | 217<br>(70.5) | 257<br>(67.5) |        |
|           | >50                         | 314<br>(32.2) | 711<br>(28.4)  | 192<br>(26.7)  | 91<br>(29.6)  | 124<br>(32.6) | 0.04   |
| COPSOQ-I  | <=50                        | 267<br>(74.4) | 819<br>(78.0)  | 162<br>(77.9)  | 59<br>(67.8)  | 54<br>(79.4)  |        |
|           | >50                         | 92<br>(25.6)  | 231<br>(22.0)  | 46<br>(22.1)   | 28<br>(32.2)  | 14<br>(20.6)  | 0.79   |
| COPSOQ-II | <=50                        | 378<br>(68.9) | 1230<br>(69.0) | 486<br>(71.9)  | 163<br>(77.3) | 130<br>(73.5) |        |
|           | >50                         | 163<br>(30.1) | 552<br>(31.0)  | 190<br>(28.1)  | 48<br>(22.8)  | 47<br>(26.6)  | 0.22   |
| PUMA      | <=50                        | 412<br>(69.4) | 791<br>(74.0)  | 94<br>(77.1)   | 25<br>(75.8)  | 9<br>(56.3)   |        |
|           | >50                         | 182<br>(30.6) | 278<br>(26.0)  | 28<br>(23.0)   | 8 (24.2)      | 7<br>(43.8)   | 0.11   |
|           | <b>Socioeconomic status</b> |               |                |                |               |               |        |
| WHII      | Low                         | 131<br>(34.0) | 1058<br>(26.8) | 146<br>(9.8)   | 91 (8.4)      | 48<br>(6.4)   |        |
|           | Intermediate                | 155<br>(40.2) | 2172<br>(55.0) | 716<br>(48.1)  | 468<br>(43.4) | 286<br>(38.2) |        |
|           | High                        | 99<br>(25.7)  | 719<br>(18.2)  | 626<br>(42.1)  | 520<br>(48.2) | 415<br>(55.4) | <0.001 |
| SLOSH     | Low                         | 780<br>(46.0) | 1047<br>(34.9) | 420<br>(21.1)  | 174<br>(22.0) | 265<br>(36.6) |        |
|           | Medium                      | 780<br>(44.0) | 1439<br>(48.0) | 955<br>(48.0)  | 347<br>(43.9) | 283<br>(39.0) |        |
|           | High                        | 169<br>(10.0) | 513<br>(17.1)  | 614<br>(30.9)  | 269<br>(34.0) | 177<br>(24.4) | <0.001 |
| WOLF      | Low                         | 266<br>(35.2) | 3021<br>(57.9) | 1078<br>(32.3) | 74<br>(14.0)  | 27<br>(10.0)  |        |
|           | Medium                      | 421<br>(55.8) | 1918<br>(36.8) | 1710<br>(51.2) | 252<br>(47.8) | 96<br>(35.6)  |        |
|           | High                        | 68 (9.0)      | 278 (5.3)      | 551<br>(16.5)  | 201<br>(38.1) | 147<br>(54.4) | <0.001 |
| DWECS00   | Low                         | 409<br>(46.2) | 1402<br>(46.2) | 287<br>(36.4)  | 122<br>(37.0) | 146<br>(34.2) |        |
|           | Medium                      | 292<br>(33.0) | 892<br>(29.4)  | 221<br>(28.1)  | 86<br>(26.1)  | 171<br>(40.1) |        |

|           |        |               |                |               |               |               |        |
|-----------|--------|---------------|----------------|---------------|---------------|---------------|--------|
|           | High   | 184<br>(20.8) | 743<br>(24.5)  | 280<br>(35.5) | 122<br>(37.0) | 110<br>(25.8) | <0.001 |
| DWECS05   | Low    | 428<br>(43.9) | 1033<br>(39.8) | 255<br>(35.5) | 105<br>(34.1) | 175<br>(45.9) |        |
|           | Medium | 319<br>(32.8) | 780<br>(30.1)  | 177<br>(24.6) | 84<br>(27.3)  | 99<br>(26.0)  |        |
|           | High   | 227<br>(23.3) | 783<br>(30.2)  | 287<br>(39.9) | 119<br>(38.6) | 107<br>(28.1) | 0.07   |
| COPSOQ-I  | Low    | 158<br>(44.0) | 503<br>(47.9)  | 75<br>(36.1)  | 19<br>(21.8)  | 24<br>(35.3)  |        |
|           | Medium | 109<br>(30.4) | 289<br>(27.5)  | 60<br>(28.9)  | 27<br>(31.0)  | 27<br>(39.7)  |        |
|           | High   | 92<br>(25.6)  | 258<br>(24.6)  | 73<br>(35.1)  | 41<br>(47.1)  | 17<br>(25.0)  | 0.06   |
| COPSOQ-II | Low    | 245<br>(45.3) | 782<br>(43.9)  | 255<br>(37.7) | 68<br>(32.2)  | 86<br>(48.6)  |        |
|           | Medium | 170<br>(31.4) | 535<br>(30.0)  | 173<br>(25.6) | 56<br>(26.5)  | 32<br>(18.1)  |        |
|           | High   | 126<br>(23.3) | 465<br>(26.1)  | 248<br>(36.7) | 87<br>(41.2)  | 59<br>(33.3)  | 0.003  |
| PUMA      | Low    | 309<br>(52.0) | 434<br>(40.6)  | 30<br>(24.6)  | 10<br>(30.3)  | *             |        |
|           | Medium | 105<br>(17.7) | 410<br>(38.4)  | 28<br>(23.0)  | 9 (27.3)      | *             |        |
|           | High   | 180<br>(30.3) | 225<br>(21.0)  | 64<br>(52.5)  | 14<br>(42.4)  | *             |        |

\* less than five cases in a cell. The exact numbers cannot be reported.

**eTable 4.** Cohort descriptions

|                                               | FPS        | HeSSup    | Whitehall II | SLOSH      | WOLF       | DWECS00   | DWECS05   | COPSOQ-I   | COPSOQ-II | PUMA       | Replication, pooled (weighted mean) |
|-----------------------------------------------|------------|-----------|--------------|------------|------------|-----------|-----------|------------|-----------|------------|-------------------------------------|
| Total N                                       | 44635      | 14964     | 7650         | 9081       | 10231      | 5467      | 4978      | 1772       | 3387      | 1834       |                                     |
| Baseline year                                 | 2000-2002  | 1998-2000 | 1991-1993    | 2008       | 1992-1997  | 2000      | 2005      | 1997       | 2004-2005 | 1999-2000  |                                     |
| End of maximum follow-up, year, morbidity     | 2016       | 2012      | 2017         | 2018       | 2009       | 2010      | 2010      | 2010       | 2010      | 2010       |                                     |
| End of maximum follow-up, year, mortality     | 2018       | 2015      | 2017         | 2020       | 2009       | 2010      | 2010      | 2010       | 2010      | 2010       |                                     |
| Mean follow-up time, until 65 (SD), morbidity | 13.8 (2.8) |           | 11.5 (5.9)   | 8.8 (3.0)  | 13.0 (3.4) | 5.6 (3.7) | 3.7 (1.8) | 6.6 (4.7)  | 4.1 (2.2) | 5.9 (4.0)  | 8.1                                 |
| Mean follow-up time, maximum (SD), morbidity  | 15.1 (1.6) |           | 20.8 (4.0)   | 10.4 (1.2) | 14.2 (2.0) | 5.8 (3.8) | 3.7 (1.8) | 6.8 (4.9)  | 4.1 (2.2) | 6.1 (4.1)  | 8.9                                 |
| Mean follow-up time, until 65 (SD), mortality | 15.3 (3.5) |           | 11.6 (5.8)   | 8.5 (0.6)  | 13.0 (3.4) | 9.4 (1.9) | 5.0 (0.5) | 12.1 (2.3) | 5.9 (0.5) | 10.5 (1.9) | 9.4                                 |
| Mean follow-up time, maximum (SD), mortality  | 17.3 (1.8) |           | 20.9 (3.9)   | 11.7 (1.0) | 14.2 (2.0) | 9.8 (1.3) | 5.0 (0.5) | 12.7 (1.7) | 5.9 (0.5) | 11.0 (1.1) | 8.1                                 |

\* Less than 5 cases. The exact number cannot be reported.

## Web appendix 4: Tests of proportionality assumption and graphical illustrations where the assumption is not met

**eTable 5.** Interaction between log(time) and working hours

| Disease                                    | Total | Event | ChiSq (df=4) | ProbChiSq |
|--------------------------------------------|-------|-------|--------------|-----------|
| Infections                                 | 59085 | 1865  | 1.80         | 0.7720    |
| Bacterial infections                       | 59530 | 1645  | 0.55         | 0.9689    |
| Cancer                                     | 58996 | 3586  | 1.84         | 0.7659    |
| Melanoma                                   | 59483 | 549   | 6.53         | 0.1626    |
| Breast cancer                              | 43715 | 1615  | 7.58         | 0.1082    |
| Prostate cancer                            | 15481 | 279   | 1.02         | 0.9068    |
| Leukaemia, lymphoma                        | 59469 | 336   | 2.37         | 0.6674    |
| Endocrine diseases                         | 59020 | 1861  | 1.11         | 0.8924    |
| Diabetes                                   | 58926 | 3138  | 6.18         | 0.1862    |
| Mental and behavioural disorders           | 59199 | 1231  | 5.92         | 0.2050    |
| Disorders due to substance abuse           | 59530 | 378   | 8.63         | 0.0710    |
| Mood disorders                             | 59370 | 658   | 11.12        | 0.0252    |
| Diseases of the nervous system             | 58549 | 3814  | 0.59         | 0.9643    |
| Epilepsy                                   | 59136 | 335   | 4.29         | 0.3685    |
| TIA                                        | 59501 | 450   | 2.84         | 0.5844    |
| Sleep disorders                            | 59530 | 1488  | 4.40         | 0.3542    |
| Diseases of the eye                        | 59136 | 2682  | 1.45         | 0.8361    |
| Diseases of the ear                        | 59237 | 733   | 1.14         | 0.8885    |
| Diseases of the circulatory system         | 57376 | 6246  | 7.21         | 0.1254    |
| Hypertension                               | 55737 | 4384  | 0.83         | 0.9340    |
| Ischemic heart diseases                    | 59153 | 1587  | 1.27         | 0.8666    |
| Angina pectoris                            | 59235 | 715   | 2.19         | 0.7004    |
| Myocardial infarction                      | 59473 | 523   | 4.78         | 0.3107    |
| Arrhythmias                                | 59266 | 1898  | 8.23         | 0.0833    |
| Cerebrovascular diseases                   | 59452 | 776   | 0.97         | 0.9142    |
| Stroke                                     | 59471 | 643   | 1.27         | 0.8668    |
| Cerebral infarction                        | 59502 | 407   | 1.35         | 0.8535    |
| Diseases of the respiratory system         | 57616 | 4098  | 5.75         | 0.2184    |
| Influenza and Pneumonia                    | 59530 | 1268  | 1.99         | 0.7369    |
| Asthma                                     | 57455 | 2116  | 7.22         | 0.1245    |
| Diseases of the digestive system           | 57398 | 7135  | 7.24         | 0.1236    |
| Appendicitis                               | 59530 | 837   | 1.72         | 0.7866    |
| Diseases of liver                          | 59530 | 438   | 1.59         | 0.8103    |
| Diseases of the skin                       | 59265 | 714   | 2.47         | 0.6495    |
| Diseases of the musculoskeletal system     | 55602 | 10907 | 8.84         | 0.0651    |
| Rheumatoid arthritis and related disorders | 58756 | 1278  | 1.09         | 0.8963    |
| Osteoarthritis                             | 59530 | 3631  | 9.74         | 0.0450    |
| Sciatica                                   | 59530 | 1116  | 2.70         | 0.6099    |
| Back pain                                  | 59530 | 476   | 5.96         | 0.2018    |
| Soft tissue disorders                      | 59530 | 3848  | 8.84         | 0.0651    |
| Diseases of the genitourinary system       | 56402 | 7342  | 9.70         | 0.0457    |
| Pregnancy complications                    | 43070 | 1407  | 4.32         | 0.3642    |
| Circulatory and respiratory symptoms       | 59530 | 1401  | 2.05         | 0.7268    |
| Digestive and abdominal symptoms           | 59530 | 1446  | 1.38         | 0.8473    |

|                           |       |      |      |        |
|---------------------------|-------|------|------|--------|
| Injury                    | 59530 | 6560 | 6.06 | 0.1944 |
| Falls                     | 44635 | 2601 | 1.01 | 0.9078 |
| Death                     | 59530 | 1650 | 5.40 | 0.2485 |
| Death / Cancer            | 59530 | 809  | 6.20 | 0.1848 |
| Death / CVD               | 59530 | 234  | 5.24 | 0.2637 |
| Death / nonCancer, nonCVD | 59530 | 607  | 3.67 | 0.4520 |

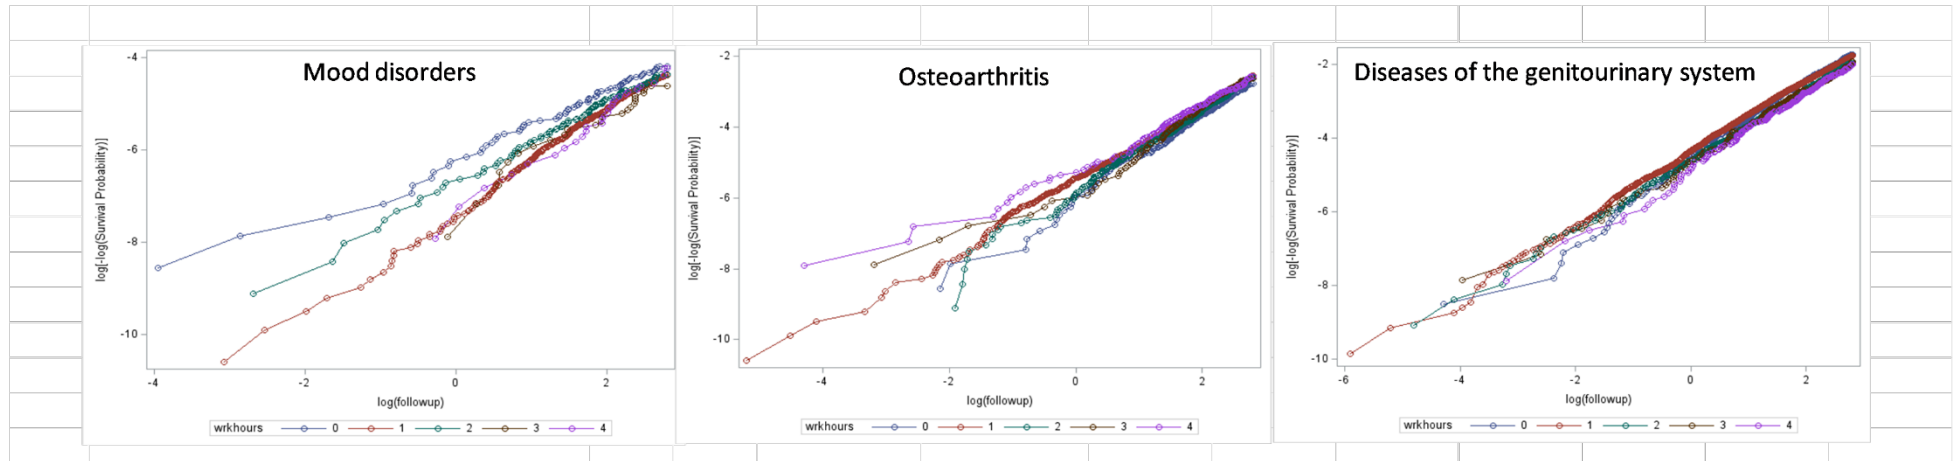

eFigure 1. log-log plot:  $\log(\text{follow-up})$  versus  $\log(-\log(\text{survival}))$  for those outcomes where proportionality assumption was not met.

## Web appendix 5: Statistical code

```

*****
** Table 1, Figure 2-3, eTable6-10,15 **;
*****
** disease=dg, exposure=altiste, output file=resfile **;
** data sets: Tyoika_taudit (diseases), hlot (persons) **;
*****
%macro cox1 (dg,altiste,resfile);
data tauti;
  set lib.Tyoika_taudit;
  IF dgnro=&dg;
data t1;
  merge hlot(in=i) tauti;
  by tutknro;
  if i;
data t2;
  set t1;
  if .<slaalkupvm<=seurloppupvm then status=1; else status=0;
  seuraika=(min(slaalkupvm,kuolinpvm,seurloppupvm)-alkupvm+1)/365.25;
  if &dg IN (79,81,82,83,84) then do;
  if .<slaalkupvm<=mortseurloppupvm then status=1; else status=0;
  seuraika=(min(slaalkupvm,kuolinpvm,mortseurloppupvm)-alkupvm+1)/365.25; end;
  if &dg IN (4,5,6,7,8,9,10,11,12,15,18,20,21,22,24,25,26,28,33,34,35,36,38,39,40,41,42,43,44,
48,49,52,59,60,66,1,13,14,17,23,30,31,32,46,50,56,58,65,67) and exslaalkupvm>. then extauti=1;
  if seuraika<=0 or extauti=1 or (sex=1 and &dg IN (8,67,68,69,70)) or (sex=2 and &dg=9)
  then do; status=.; seuraika=.; end;
  if study=2 and &dg IN (75,76,77,78) then do; status=.; seuraika=.; end;
  if status=1 then age_disease=age+seuraika;
  lnseuraika=log(seuraika/10000); run;
proc freq data=t2 noprint; where status>. ; tables &altiste / out=freqt; data freqt; set freqt; Total=count;
  proc freq data=t2 noprint; where status=1; tables &altiste / out=freq1; data freq1; set freq1; Event=count;
proc means data=t2 nway noprint;
  var age_disease; class &altiste; output out=ka mean=;
proc genmod data=t2;
  class &altiste;
  model status = sex age study &altiste / dist=poisson offset=lnseuraika;
  lsmeans &altiste / exp cl;
  ods output LSMeans=lm;
proc phreg data=t2;
  class &altiste(ref='1');
  model seuraika*status(o) = sex age study &altiste / rl;
  ods output ParameterEstimates=pe1 CensoredSummary=cs; run;
proc phreg data=t2;
  where &altiste>0;
  model seuraika*status(o) = sex age study &altiste / rl;
  ods output ParameterEstimates=pe2 CensoredSummary=cs; run;
data pe1; set pe1; if Parameter='wrkhours'; wrkhours=1*ClassValo;
data pe2; set pe2; if Parameter='wrkhours'; wrkhours=4;
rename HazardRatio=HR_trend HRLowerCL=HR_trend_LCL HRUpperCL=HR_trend_UCL
ProbChiSq=P_trend;
data res; merge pe1 pe2 freqt freq1 ka lm; by wrkhours; dgnro=&dg;
incidence_10000=ExpEstimate;
keep parameter wrkhours dgnro Total Event HazardRatio HRLowerCL HRUpperCL ProbChiSq
HR_trend HR_trend_LCL HR_trend_UCL P_trend age_disease incidence_10000;
data res; merge res(in=i) lib.Tautiselitteet; by dgnro; if i;
proc append base=&resfile data=res;
run;
%mend;

```

```

*****;
** all diseases **;
proc datasets lib=work memtype=data nolist; delete results_all; quit;
%MACRO coxkaikki;
%DO I = 1 %TO 84;
  %coxit(&I,wrkhours,results_all);
%END;
%MEND coxkaikki;
%coxkaikki;
proc print data=results_all;
  id dgnro;
  var selite wrkhours Total Event HazardRatio HRLowerCL HRUpperCL ProbChiSq
  HR_trend HR_trend_LCL HR_trend_UCL P_trend incidence_10000 age_disease;
run;
*****;
** selected diseases **;
proc datasets lib=work memtype=data nolist; delete results; quit;
%coxit(79,wrkhours,results);
%coxit(15,wrkhours,results);
%coxit(34,wrkhours,results);
%coxit(41,wrkhours,results);
%coxit(81,wrkhours,results);
%coxit(82,wrkhours,results);
proc print data=results;
  id dgnro;
  var selite wrkhours Total Event HazardRatio HRLowerCL HRUpperCL ProbChiSq
  HR_trend HR_trend_LCL HR_trend_UCL P_trend incidence_10000 age_disease;
run;
*****;
** Table 2 (PAF) **;
*****;
data paf;
  set results;
  prop=0.0505; *exposed*;
  PAF=prop*(HazardRatio-1)/(1+prop*(HazardRatio-1))*100;
  PAF_lower=prop*(HRLowerCL-1)/(1+prop*(HRLowerCL-1))*100;
  PAF_upper=prop*(HRUpperCL-1)/(1+prop*(HRUpperCL-1))*100;
proc print data=paf; where wrkhours=4;
  id dgnro;
  var selite wrkhours HazardRatio HRLowerCL HRUpperCL PAF PAF_lower PAF_upper;
run;

*****;
** false-discovery-rate (FDR) correction **;
data pdata;
input raw_p;
cards;
0.0043
0.0041
0.9855
0.8521
0.0871
0.1220
0.00009
0.1830
0.0362
0.2373
;
run;
proc multtest inpvalues=pdata bonferroni fdr;
run;

*****;

```



```

** Figure 5 **;
*****;
** outcome disease = vasdg, exposure disease = altdg, **;
** data sets: Tyoaika_taudit (diseases), hlot2 (persons) **;
*****;
%macro coxtimedep (altdg,vasdg,resfile);
data hlot2;
  set hlot;
  IF wrkhours=4;
data altiste;
  set lib.Tyoaika_taudit;
  IF dgnro=&altdg;
  altistepvm=min(exslaalkupvm,slaalkupvm);
  keep tutknro altistepvm;
data tauti;
  set lib.Tyoaika_taudit;
  IF dgnro=&vasdg;
  rename exslaalkupvm=extautipvm slaalkupvm=tautipvm;
  keep tutknro exslaalkupvm slaalkupvm;
data t1;
  merge hlot2(in=i) altiste tauti;
  by tutknro;
  if i;
run;
data t2;
  set t1;
  if &vasdg IN (79,81,82,83,84) then seurloppupvm=mortseurloppupvm;

  if altistepvm>seurloppupvm then altistepvm=.;
  if tautipvm>seurloppupvm then tautipvm=.;

  if .<altistepvm<alkupvm then altistepvm=alkupvm;
  altaika=round((altistepvm-alkupvm+1)/365.25,0.01);
  if .<tautipvm<altistepvm then do; altaika=.; tauti_alt=1; end;

  if tautipvm>. then status=1; else status=0;
  seuraika=(min(tautipvm,kuolinpvm,seurloppupvm)-alkupvm+1)/365.25;
  seuraika=round(seuraika,0.01);

  if altaika=. then altaika=seuraika;
  if 0<=altaika<seuraika then altistus=1; else altistus=0;
  if altaika=0 then altistuso=1; else altistuso=0;

  if &vasdg IN
(4,5,6,7,8,9,10,11,12,15,18,20,21,22,24,25,26,28,33,34,35,36,38,39,40,41,42,43,44,48,49,52,59,60,66,1,13,14,
17,23,30,31,32,46,50,56,58,65,67) and extautipvm>. then extauti=1;
  if (sex=1 and &altdg IN (8,67,68,69,70)) or (sex=2 and &altdg=9) or
  (sex=1 and &vasdg IN (8,67,68,69,70)) or (sex=2 and &vasdg=9) then status=.;
  if study=2 and (&altdg IN (75,76,77,78) or &vasdg IN (75,76,77,78)) then status=.;
  if extauti=1 or status=. then delete;
run;
proc freq data=t2 noprint;
  tables altistus*status / out=altn;
  data alto; set altn; if altistus=1 and status=0; alt_status0=count; keep alt_status0;
  data alta; set altn; if altistus=1 and status=1; alt_status1=count; keep alt_status1;
proc phreg data=t2;
  model seuraika*status(o) = sex age study timedep_altistus / rl;
  if seuraika<=altaika then timedep_altistus=0; else timedep_altistus=1;
  ods output ParameterEstimates=pe CensoredSummary=cs;
  data pe; set pe(firstobs=4);
  data res; merge pe cs alto alt1; vastedg=&vasdg; altistedg=&altdg;
  alt_Total=sum(alt_status0,alt_status1); alt_Event=alt_status1;

```

```

keep parameter altistedg vastedg Total Event HazardRatio HRLowerCL HRUpperCL ProbChiSq alt_Total
alt_Event;
data vTautiselitteet; set lib.Tautiselitteet; rename dgnro=vastedg selite=vselite;
data aTautiselitteet; set lib.Tautiselitteet; rename dgnro=altistedg selite=aselite;
data res; merge res(in=i) vTautiselitteet; by vastedg; if i;
data res; merge res(in=i) aTautiselitteet; by altistedg; if i; run;
proc append base=&resfile data=res;
run;
%mend;
*****;
** selected diseases **;
proc datasets lib=work memtype=data nolist; delete results; quit;
%coxtimedep(2,15,results);
%coxtimedep(2,9,results);
%coxtimedep(15,2,results);
%coxtimedep(9,2,results);
proc print data=results;
id altistedg;
var aselite vastedg vselite HazardRatio HRLowerCL HRUpperCL ProbChiSq Total Event alt_Total
alt_Event;
run;

*****;
** eTable 5 (proportionality tests) **;
*****;
%macro coxph (dg,altiste,resfile);
data tauti;
set lib.Tyoaika_taudit;
IF dgnro=&dg;
data t1;
merge hlot(in=i) tauti;
by tutknro;
if i;
data t2;
set t1;
if <slaalkupvm<=seurloppupvm then status=1; else status=0;
seuraika=(min(slaalkupvm,kuolinpvm,seurloppupvm)-alkupvm+1)/365.25;
if &dg IN (79,81,82,83,84) then do;
if <slaalkupvm<=mortseurloppupvm then status=1; else status=0;
seuraika=(min(slaalkupvm,kuolinpvm,mortseurloppupvm)-alkupvm+1)/365.25; end;
if &dg IN (4,5,6,7,8,9,10,11,12,15,18,20,21,22,24,25,26, 28,33,34,35,36,38,39,40,41,42,43,44,
48,49,52,59,60,66,1,13,14,17,23,30,31,32,46,50,56,58,65,67) and exslaalkupvm>. then extauti=1;
if seuraika<=0 or extauti=1 or (sex=1 and &dg IN (8,67,68,69,70)) or (sex=2 and &dg=9)
then do; status=.; seuraika=.; end;
if study=2 and &dg IN (75,76,77,78) then do; status=.; seuraika=.; end;
alto=0; alt2=0; alt3=0; alt4=0;
if &altiste=0 then alto=1;
if &altiste=2 then alt2=1;
if &altiste=3 then alt3=1;
if &altiste=4 then alt4=1;
proc phreg data=t2;
class ses;
model seuraika*status(o) = sex age ses study alto alt2 alt3 alt4 altimeo altime2 altime3 altime4 / rl;
altimeo=alto*log(seuraika);
altime2=alt2*log(seuraika);
altime3=alt3*log(seuraika);
altime4=alt4*log(seuraika);
proportionality_test: test altimeo, altime2, altime3, altime4;
ods output CensoredSummary=cs TestStmts=ph;
data res; merge cs ph; dgnro=&dg;
keep dgnro Total Event label WaldChiSq DF ProbChiSq;
data res; merge res(in=i) lib.Tautiselitteet; by dgnro; if i;
proc append base=&resfile data=res;

```

```

run;
%mend;
** all diseases **;
proc datasets lib=work memtype=data nolist; delete results; quit;
%MACRO coxkaikki;
%DO I = 1 %TO 83;
  %coxph(&I,wrkhours,results);
%END;
%MEND coxkaikki;
%coxkaikki;
proc print data=results;
  id dgnro;
  var selite Total Event label WaldChiSq DF ProbChiSq;
run;

*****;
** eFigure 1 (log-log plot) **;
*****;
proc lifetest data=t2 notable plots=(logsurv, lls);
time seuraika*status(0);
strata wrkhours;
run;

*****;
** eFigure 2 (Kaplan-Meier) **;
*****;
data d1;
  set lib.Tyoaika_taudit;
  IF dgnro=79;
data d2;
  merge hlot(in=i) d1;
  by tutknro;
  if i;
data d3;
  set d2;
  if <.slaalkupvm<=seurloppupvm then status=1; else status=0;
  seuraika=(min(slaalkupvm,kuolinpvm,seurloppupvm)-alkupvm+1)/365.25;
  if dgnro IN (79,81,82,83,84) then do;
  if <.slaalkupvm<=mortseurloppupvm then status=1; else status=0;
  seuraika=(min(slaalkupvm,kuolinpvm,mortseurloppupvm)-alkupvm+1)/365.25; end;
  if dgnro IN (4,5,6,7,8,9,10,11,12,15,18,20,21,22,24,25,26,28,33,34,35,36,38,39,40,41,42,43,44,
  48,49,52,59,60,66,1,13,14,17,23,30,31,32,46,50,56,58,65,67) and exslaalkupvm>. then extauti=1;
  if seuraika<=0 or extauti=1 or (sex=1 and dgnro IN (8,67,68,69,70)) or (sex=2 and dgnro=9)
  then delete;
  if study=2 and dgnro IN (75,76,77,78) then do; status=.; seuraika=.; end;
  age_end=age+seuraika;
run;
*****;
proc phreg data=d3;
model (age age_end)*status(0) = ;
strata wrkhours;
baseline out=apu1 survival=survival;
run;
data apu2;
set apu1;
rename age_end=time wrkhours=group;
run;
data apu3;
set apu2;
by group;
retain prehazard 0;
hazard=1-survival;
if (hazard>. and hazard NE prehazard) or first.group;

```

```

prehazard=hazard;
keep group time hazard;
data apu4;
set apu3;
retain prehazard pregroup 0;
if group=pregroup then do;
cumhazard=prehazard; output; end;
cumhazard=hazard; output;
pregroup=group;
prehazard=hazard;
keep group time cumhazard;
data apu4;
set apu4;
cumhazard=100*cumhazard;
run;
proc print data=apu4; ** => Excel figure **;
run;

*****;
** eTable 11 (time-dependent working hours) **;
*****;

%macro coxitz2 (dg,altiste,resfile);
data tauti;
  set lib.Tyoaika_taudit;
  IF dgnro=&dg;
data t1;
  merge hlot(in=i) tauti lib.Tyoaika_2004;
  by tutknro;
  if i;
data t2;
  set t1;
  if .<slaalkupvm<=seurloppupvm then status=1; else status=0;
  seuraika=(min(slaalkupvm,kuolinpvm,seurloppupvm)-alkupvm+1)/365.25;
  if &dg IN (79,81,82,83,84) then do;
  if .<slaalkupvm<=mortseurloppupvm then status=1; else status=0;
  seuraika=(min(slaalkupvm,kuolinpvm,mortseurloppupvm)-alkupvm+1)/365.25; end;
  if &dg IN (4,5,6,7,8,9,10,11,12,15,18,20,21,22,24,25,26,28,33,34,35,36,38,39,40,41,42,43,44,
  48,49,52,59,60,66,1,13,14,17,23,30,31,32,46,50,56,58,65,67) and exslaalkupvm>. then extauti=1;
  if seuraika<=0 or extauti=1 or (sex=1 and &dg IN (8,67,68,69,70)) or (sex=2 and &dg=g)
  then do; status=.; seuraika=.; end;
  if study=2 and &dg IN (75,76,77,78) then do; status=.; seuraika=.; end;
  if wrkhours2=. then wrkhours2=wrkhours;
  alt10=0; alt12=0; alt13=0; alt14=0;
  if wrkhours=0 then alt10=1;
  if wrkhours=2 then alt12=1;
  if wrkhours=3 then alt13=1;
  if wrkhours=4 then alt14=1;
  alt20=0; alt22=0; alt23=0; alt24=0;
  if wrkhours2=0 then alt20=1;
  if wrkhours2=2 then alt22=1;
  if wrkhours2=3 then alt23=1;
  if wrkhours2=4 then alt24=1;
proc phreg data=t2;
  class ses;
  model seuraika*status(o) = sex age ses study td_wrkho td_wrkh2 td_wrkh3 td_wrkh4 / rl;
  if study=1 then do;
  if 0<=seuraika<4 then do; td_wrkho=alt10; td_wrkh2=alt12; td_wrkh3=alt13; td_wrkh4=alt14; end;
  if seuraika>=4 then do; td_wrkho=alt20; td_wrkh2=alt22; td_wrkh3=alt23; td_wrkh4=alt24; end;
  end;
  if study=2 then do;
  if 0<=seuraika<5 then do; td_wrkho=alt10; td_wrkh2=alt12; td_wrkh3=alt13; td_wrkh4=alt14; end;
  if seuraika>=5 then do; td_wrkho=alt20; td_wrkh2=alt22; td_wrkh3=alt23; td_wrkh4=alt24; end;
  end;
end;

```

```

ods output ParameterEstimates=pe1; run;
data res; set pe1; if substr(Parameter,1,3)='td_'; dgnro=&dg;
keep parameter dgnro HazardRatio HRLowerCL HRUpperCL ProbChiSq;
data res; merge res(in=i) lib.Tautiselitteet; by dgnro; if i;
proc append base=&resfile data=res;
run;
%mend;
** selected diseases **;
proc datasets lib=work memtype=data nolist; delete results; quit;
%coxit2(2,wrkhours,results);
%coxit2(15,wrkhours,results);
%coxit2(58,wrkhours,results);
%coxit2(73,wrkhours,results);
%coxit2(82,wrkhours,results);
%coxit2(79,wrkhours,results);
proc print data=results;
id dgnro;
var selite parameter HazardRatio HRLowerCL HRUpperCL ProbChiSq;
run;

*****;
** eTable 12 (multimorbidity) **;
*****;
data valtaudit1; ** selected diseases **;
set lib.Tyoaika_taudit;
IF dgnro IN (2,15,58,73,82);
proc freq data=valtaudit1 noprint; where dgnro=15 and exslaalkupvm>;
tables tutknro / out=poisprev; ** prevalent disease **;
data valtaudit2;
set valtaudit1;
if slaalkupvm>;
proc sort data=valtaudit2;
by tutknro slaalkupvm;
run;
data ekatauti; ** 1. disease **;
set valtaudit2;
by tutknro;
if first.tutknro;
rename dgnro=dgnro1 slaalkupvm=slaalkupvm1;
keep tutknro dgnro slaalkupvm;
run;
data tokatauti;
set valtaudit2;
by tutknro;
if first.tutknro then delete;
data tokatauti; ** 2. disease **;
set tokatauti;
by tutknro;
if first.tutknro;
rename dgnro=dgnro2 slaalkupvm=slaalkupvm2;
keep tutknro dgnro slaalkupvm;
run;
data multi1; ** disease pairs **;
merge ekatauti tokatauti(in=i);
by tutknro;
if i;
run;
*****;
data t1;
merge hlot(in=i) poisprev(in=j) multi1;
by tutknro;
if i and NOT j;
data t2;

```

```

set t1;
if .<slaalkupvm2<=seurloppupvm then status=1; else status=0;
seuraika=(min(slaalkupvm2,kuolinpvm,seurloppupvm)-alkupvm+1)/365.25;
if status=0 then dgpari="";
if seuraika<=0 then delete;
run;
** multimorbidity HR **;
proc phreg data=t2;
  class wrkhours(ref='1') ses;
  model seuraika*status(o) = sex age ses study wrkhours / rl;
run;

*****;
** eTable 13 **;
*****;
proc genmod data=hlot2;
  class wrkhours ses;
  model resp = wrkhours / dist=bin link=log;
*  model resp = sex age ses study wrkhours / dist=bin link=log;
  lsmeans wrkhours / exp cl;
  ** Risk Ratios **;
  estimate '0 vs 1' wrkhours 1 -1 0 0 0;
  estimate '2 vs 1' wrkhours 0 -1 1 0 0;
  estimate '3 vs 1' wrkhours 0 -1 0 1 0;
  estimate '4 vs 1' wrkhours 0 -1 0 0 1;
run;

*****;
** eTable 16 **;
*****;
proc means data=lib.Tyoaika_taudit nway noprint;
where dgnro IN (2,15,58,73); ** selected diseases **;
  var exslaalkupvm slaalkupvm;
  class tutknro;
  output out=taudit min=;
run;
data hlot3;
  merge hlot1(in=i) taudit;
  by tutknro;
  if i;
data hlot4;
  set hlot3;
  ** long working hours, no disease **;
  IF wrkhours=4 and wrkhours2>. and exslaalkupvm=.;
  if 0<=wrkhours2<=3 then wrkhours2=0;
  if alkupvm<=slaalkupvm<=vastauspvm2 then sick=1;
  else sick=0;
run;
proc genmod data=hlot4;
  class ses;
  model wrkhours2(ref='0') = sex age ses study sick / dist=bin link=log;
*  model wrkhours2(ref='0') = sex age ses study sick sex*sick / dist=bin link=log;
  estimate '1 vs 0' sick 1;
run;

```

## Web appendix 6: Supplementary results to primary analysis

**eTable 6.** Hazard ratios for long (>55 h/wk) versus regular (35-40 h/wk) working hours at baseline in relation to risk of 46 disease and 4 death outcomes in primary analysis (follow-up until 65).

| ICD-10 disease chapter                        | 35-40 h/wk<br>N(cases)/N(total) | ≥55 h/wk<br>N(cases)/N(total) | Model 1 |           | Model 2 |           |
|-----------------------------------------------|---------------------------------|-------------------------------|---------|-----------|---------|-----------|
|                                               |                                 |                               | HR      | 95% CI    | HR      | 95% CI    |
| <b>1. Infections</b>                          | 1414/39598                      | 133/2729                      | 1.45*   | 1.19-1.75 | 1.37*   | 1.13-1.67 |
| 2. Bacterial infections                       | 1252/39905                      | 117/2747                      | 1.47*   | 1.19-1.80 | 1.41*   | 1.15-1.74 |
| <b>3. Cancer</b>                              | 3001/39510                      | 191/2738                      | 0.98    | 0.83-1.15 | 1.00    | 0.85-1.18 |
| 4. Melanoma                                   | 573/39870                       | 34/2746                       | 1.15    | 0.74-1.77 | 1.00    | 0.65-1.56 |
| 5. Breast cancer                              | 1361/31581                      | 70/1257                       | 1.38*   | 1.06-1.79 | 1.23    | 0.95-1.60 |
| 6. Prostate cancer                            | 218/8081                        | 47/1485                       | 1.33    | 0.90-1.96 | 1.34    | 0.91-1.98 |
| 7. Leukaemia, lymphoma                        | 302/39864                       | 25/2744                       | 1.48    | 0.93-2.35 | 1.35    | 0.85-2.16 |
| <b>8. Endocrine diseases</b>                  | 1352/39575                      | 139/2714                      | 1.25*   | 1.05-1.50 | 1.25    | 1.04-1.50 |
| 9. Diabetes                                   | 2641/39505                      | 202/2715                      | 1.32*   | 1.13-1.54 | 1.18    | 1.01-1.38 |
| <b>10. Mental and behavioural disorders</b>   | 923/39677                       | 62/2733                       | 0.94    | 0.71-1.23 | 0.83    | 0.62-1.09 |
| 11. Disorders due to substance abuse          | 265/39905                       | 25/2747                       | 1.22    | 0.79-1.88 | 0.85    | 0.54-1.32 |
| 12. Mood disorders                            | 459/39800                       | 30/2743                       | 0.97    | 0.66-1.41 | 0.95    | 0.64-1.39 |
| <b>13. Diseases of the nervous system</b>     | 2881/39233                      | 223/2706                      | 1.20*   | 1.04-1.39 | 1.26*   | 1.09-1.45 |
| 14. Epilepsy                                  | 264/39630                       | 27/2733                       | 1.72*   | 1.13-2.62 | 1.62    | 1.05-2.48 |
| 15. TIA                                       | 366/39886                       | 29/2745                       | 1.40    | 0.94-2.08 | 1.29    | 0.86-1.93 |
| 16. Sleep disorders                           | 1123/39905                      | 103/2747                      | 1.72*   | 1.39-2.13 | 1.33    | 1.07-1.65 |
| <b>17. Diseases of the eye</b>                | 2743/39636                      | 144/2733                      | 0.85    | 0.70-1.05 | 0.83    | 0.67-1.01 |
| <b>18. Diseases of the ear</b>                | 535/39701                       | 41/2733                       | 1.10    | 0.78-1.54 | 1.10    | 0.78-1.55 |
| <b>19. Diseases of the circulatory system</b> | 4740/38391                      | 370/2654                      | 1.18*   | 1.05-1.32 | 1.09    | 0.97-1.22 |
| 20. Hypertension                              | 3264/37235                      | 241/2580                      | 1.09    | 0.95-1.25 | 1.01    | 0.88-1.16 |
| 21. Ischemic heart diseases                   | 1330/39664                      | 117/2724                      | 1.46*   | 1.19-1.79 | 1.12    | 0.91-1.38 |
| 22. Angina pectoris                           | 566/39712                       | 63/2733                       | 1.68*   | 1.26-2.25 | 1.28    | 0.95-1.72 |
| 23. Myocardial infarction                     | 410/39873                       | 40/2741                       | 1.69*   | 1.20-2.36 | 1.17    | 0.83-1.65 |
| 24. Arrhythmias                               | 1783/39742                      | 128/2728                      | 1.28    | 1.03-1.58 | 1.09    | 0.87-1.36 |
| 25. Cerebrovascular diseases                  | 635/39855                       | 58/2740                       | 1.38    | 1.02-1.86 | 1.18    | 0.87-1.59 |
| 26. Stroke                                    | 543/39868                       | 51/2743                       | 1.41    | 1.02-1.95 | 1.18    | 0.85-1.64 |
| 27. Cerebral infarction                       | 356/39887                       | 38/2745                       | 1.71*   | 1.17-2.50 | 1.36    | 0.93-2.00 |
| <b>28. Diseases of the respiratory system</b> | 3029/38616                      | 211/2636                      | 0.95    | 0.82-1.11 | 0.95    | 0.82-1.11 |
| 29. Influenza and pneumonia                   | 1043/39905                      | 71/2747                       | 1.10    | 0.85-1.43 | 1.04    | 0.80-1.36 |
| 30. Asthma                                    | 1644/38467                      | 98/2662                       | 0.93    | 0.75-1.16 | 1.07    | 0.86-1.34 |
| <b>31. Diseases of the digestive system</b>   | 5171/38427                      | 401/2659                      | 1.16*   | 1.04-1.29 | 1.05    | 0.94-1.16 |
| 32. Appendicitis                              | 591/39905                       | 43/2747                       | 1.05    | 0.76-1.44 | 1.02    | 0.74-1.41 |
| 33. Diseases of liver                         | 366/39905                       | 29/2747                       | 1.31    | 0.86-1.99 | 1.22    | 0.80-1.87 |

|                                                   |            |          |       |           |       |           |
|---------------------------------------------------|------------|----------|-------|-----------|-------|-----------|
| <b>34. Diseases of the skin</b>                   | 536/39739  | 43/2733  | 1.01  | 0.72-1.42 | 1.01  | 0.71-1.43 |
| <b>35. Diseases of the musculoskeletal system</b> | 7985/37123 | 597/2604 | 1.11* | 1.02-1.21 | 1.15* | 1.06-1.26 |
| 36. Rheumatoid arthritis and related disorders    | 1011/39398 | 76/2718  | 1.32  | 1.03-1.69 | 1.54* | 1.20-1.98 |
| 37. Osteoarthritis                                | 2935/39905 | 192/2747 | 1.05  | 0.89-1.23 | 1.08  | 0.92-1.27 |
| 38. Sciatica                                      | 743/39905  | 82/2747  | 1.62* | 1.28-2.05 | 1.62* | 1.28-2.05 |
| 39. Back pain                                     | 333/39905  | 30/2747  | 1.24  | 0.83-1.84 | 1.25  | 0.83-1.87 |
| 40. Soft tissue disorders                         | 2861/39905 | 205/2747 | 1.05  | 0.91-1.22 | 1.08  | 0.93-1.25 |
| <b>41. Diseases of the genitourinary system</b>   | 5599/37592 | 307/2664 | 0.78* | 0.69-0.89 | 1.04  | 0.92-1.18 |
| <b>42. Pregnancy complications</b>                | 2935/39905 | 36/1240  | 0.82  | 0.59-1.15 | 1.01  | 0.72-1.41 |
| 43. Circulatory and respiratory symptoms          | 994/39905  | 110/2747 | 1.66* | 1.35-2.04 | 1.49* | 1.21-1.84 |
| 44. Digestive and abdominal symptoms              | 1116/39905 | 76/2747  | 0.93  | 0.72-1.19 | 1.13  | 0.87-1.46 |
| <b>45. Injury</b>                                 | 4551/39905 | 415/2747 | 1.42* | 1.28-1.58 | 1.27* | 1.14-1.41 |
| 46. Falls                                         | 2068/31770 | 118/1418 | 1.31* | 1.07-1.59 | 1.22  | 1.00-1.50 |
| <b>47. Overall mortality</b>                      | 1709/39905 | 136/2747 | 1.26  | 1.02-1.55 | 1.04  | 0.84-1.29 |
| 48. Death, cancer                                 | 888/39905  | 52/2747  | 0.81  | 0.56-1.18 | 0.78  | 0.54-1.14 |
| 49. Death, cardiovascular                         | 218/39905  | 31/2747  | 2.32* | 1.51-3.58 | 1.68  | 1.08-2.61 |
| 50. Death, other reason                           | 603/39905  | 53/2747  | 1.44  | 1.04-2.00 | 1.05  | 0.75-1.47 |

Model 1 is unadjusted; Model 2 is adjusted for age, sex, SES, and cohort.

\*Statistically significant after adjustment for False Discovery Rate of 5%.

For clarity, significant associations are highlighted.



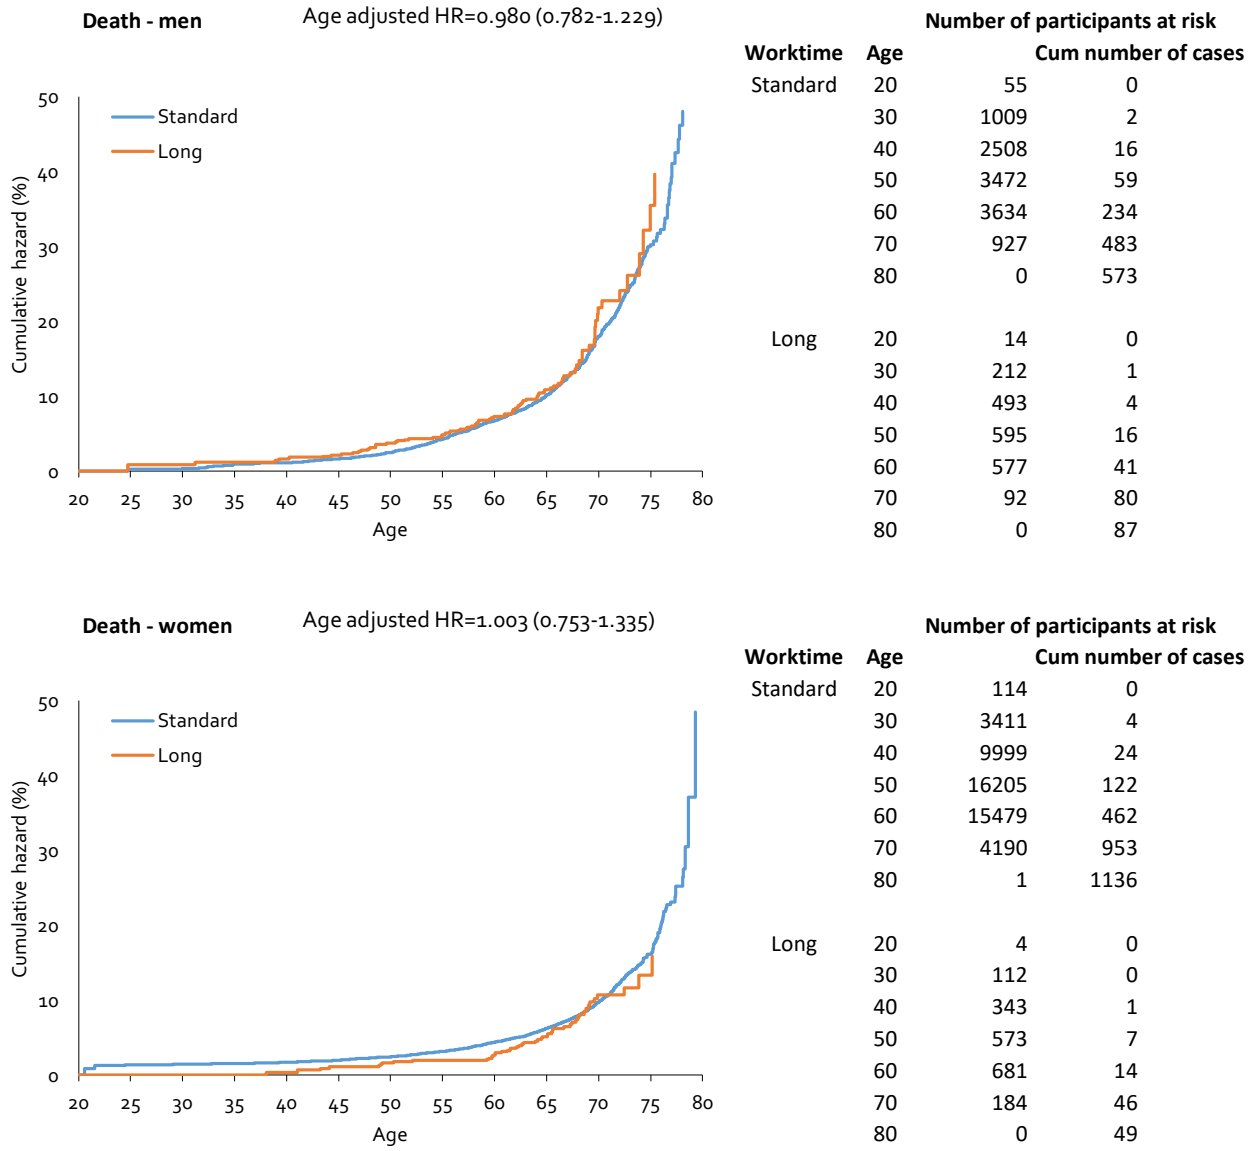

**eFigure 2.** Crude cumulative hazard of death by age, sex and working hours

**eTable 7.** Associations between selected diseases\* and long working hours (>54 h/wk) **by sex.** Follow-up until 65 years.

| Disease                              | Work hours/week | Men                  |      |           | Women                |      |           | P for interaction (regular or long hours × sex) |
|--------------------------------------|-----------------|----------------------|------|-----------|----------------------|------|-----------|-------------------------------------------------|
|                                      |                 | N of events/ Total N | HR   | 95% CI    | N of events/ Total N | HR   | 95% CI    |                                                 |
| Bacterial infections                 | 35-40           | 243/8086             | 1    |           | 806/31819            | 1    |           |                                                 |
|                                      | ≥55             | 59/1486              | 1.36 | 1.02-1.82 | 43/1261              | 1.43 | 1.05-1.95 | 0.99                                            |
| Diabetes                             | 35-40           | 605/7938             | 1    |           | 1537/31567           | 1    |           |                                                 |
|                                      | ≥55             | 108/1466             | 1.12 | 0.91-1.38 | 71/1249              | 1.26 | 0.99-1.59 | 0.56                                            |
| Epilepsy                             | 35-40           | 51/8036              | 1    |           | 164/31594            | 1    |           |                                                 |
|                                      | ≥55             | 13/1480              | 1.27 | 0.68-2.36 | 12/1253              | 2.06 | 1.14-3.71 | 0.50                                            |
| Sleep disorders                      | 35-40           | 349/8086             | 1    |           | 614/31819            | 1    |           |                                                 |
|                                      | ≥55             | 64/1486              | 1.23 | 0.94-1.62 | 30/1261              | 1.43 | 0.99-2.07 | 0.63                                            |
| Rheumatoid arthritis and related     | 35-40           | 116/8013             | 1    |           | 756/31385            | 1    |           |                                                 |
|                                      | ≥55             | 25/1475              | 1.34 | 0.86-2.08 | 44/1243              | 1.61 | 1.18-2.18 | 0.39                                            |
| Sciatica                             | 35-40           | 169/8086             | 1    |           | 549/31819            | 1    |           |                                                 |
|                                      | ≥55             | 41/1486              | 1.35 | 0.96-1.92 | 40/1261              | 1.97 | 1.42-2.72 | 0.09                                            |
| Circulatory and respiratory symptoms | 35-40           | 245/8086             | 1    |           | 633/31819            | 1    |           |                                                 |
|                                      | ≥55             | 60/1486              | 1.33 | 1.00-1.77 | 43/1261              | 1.65 | 1.20-2.26 | 0.39                                            |
| Falls                                | 35-40           | 365/5033             | 1    |           | 1428/26737           | 1    |           |                                                 |
|                                      | ≥55             | 49/550               | 1.27 | 0.94-1.72 | 53/868               | 1.15 | 0.88-1.52 | 0.64                                            |
| All-cause death                      | 35-40           | 366/8086             | 1    |           | 727/31819            | 1    |           |                                                 |
|                                      | ≥55             | 61/1486              | 0.96 | 0.73-1.26 | 34/1261              | 1.19 | 0.84-1.69 | 0.38                                            |
| Cardiovascular death                 | 35-40           | 71/8086              | 1    |           | 73/31819             | 1    |           |                                                 |
|                                      | ≥55             | 21/1486              | 1.84 | 1.12-3.04 | 4/1261               | 1.34 | 0.49-3.69 | 0.68                                            |

\* Diseases with statistically significant ( $p < 0.05$ ) association with working  $\geq 55$  h/week. Disease chapters were omitted, if specific disease(s) within the chapter had statistically significant association(s). Models adjusted for age and SES.

**eTable 8.** Associations between selected diseases\* and long working hours (>54 h/wk) by SES. Follow-up until 65 years.

| Disease                              | Work hours/ week | Low SES (manual work) | HR   | 95% CI    | High SES (non-manual work) | HR   | 95% CI    | P for interaction (regular or long hours × SES) |
|--------------------------------------|------------------|-----------------------|------|-----------|----------------------------|------|-----------|-------------------------------------------------|
|                                      |                  | N of events/ Total N  |      |           | N of events/ Total N       |      |           |                                                 |
| Bacterial infections                 | 35-40            | 274/8388              | 1    |           | 773/31479                  | 1    |           |                                                 |
|                                      | ≥55              | 42/651                | 2.09 | 1.49-2.93 | 60/2089                    | 1.12 | 0.86-1.46 | 0.03                                            |
| Diabetes                             | 35-40            | 673/8253              | 1    |           | 1468/31214                 | 1    |           |                                                 |
|                                      | ≥55              | 55/638                | 1.02 | 0.77-1.36 | 124/2070                   | 1.18 | 0.97-1.42 | 0.19                                            |
| Epilepsy                             | 35-40            | 45/8311               | 1    |           | 170/31281                  | 1    |           |                                                 |
|                                      | ≥55              | 3/645                 | 0.76 | 0.23-2.49 | 22/2081                    | 1.85 | 1.17-2.93 | 0.18                                            |
| Sleep disorders                      | 35-40            | 291/8388              | 1    |           | 672/31479                  | 1    |           |                                                 |
|                                      | ≥55              | 26/651                | 1.06 | 0.70-1.59 | 67/2089                    | 1.37 | 1.06-1.78 | 0.29                                            |
| Rheumatoid arthritis and related     | 35-40            | 198/8293              | 1    |           | 674/31067                  | 1    |           |                                                 |
|                                      | ≥55              | 17/642                | 1.30 | 0.78-2.16 | 52/2069                    | 1.54 | 1.16-2.06 | 0.68                                            |
| Sciatica                             | 35-40            | 162/8388              | 1    |           | 554/31479                  | 1    |           |                                                 |
|                                      | ≥55              | 19/651                | 1.30 | 0.79-2.12 | 62/2089                    | 1.65 | 1.26-2.16 | 0.50                                            |
| Circulatory and respiratory symptoms | 35-40            | 251/8388              | 1    |           | 627/31479                  | 1    |           |                                                 |
|                                      | ≥55              | 36/651                | 1.61 | 1.12-2.31 | 66/2089                    | 1.37 | 1.06-1.77 | 0.51                                            |

|                      |       |          |      |               |            |      |               |      |
|----------------------|-------|----------|------|---------------|------------|------|---------------|------|
| Falls                | 35-40 | 437/6451 | 1    |               | 1356/25319 | 1    |               |      |
|                      | ≥55   | 30/304   | 1.36 | 0.93-<br>1.97 | 72/1114    | 1.13 | 0.89-<br>1.44 | 0.48 |
| Cardiovascular death | 35-40 | 57/8388  | 1    |               | 87/31479   | 1    |               |      |
|                      | ≥55   | 11/651   | 1.85 | 0.95-<br>3.61 | 14/2089    | 1.41 | 0.79-<br>2.53 | 0.86 |

\* Diseases with statistically significant ( $p < 0.05$ ) association with working  $> 54$  h/week. Disease chapters were omitted, if specific disease(s) within the chapter had statistically significant association(s). Models adjusted for age and sex.

**eTable 9.** Associations between selected diseases\* and long working hours ( $\geq 55$  h/wk) by age. Follow-up until 65 years.

| Disease                              | Work hours/ week | Age $\leq 50$        |      |           | Age $> 50$           |      |           | P for interaction (regular or long hours $\times$ age) |
|--------------------------------------|------------------|----------------------|------|-----------|----------------------|------|-----------|--------------------------------------------------------|
|                                      |                  | N of events/ Total N | HR   | 95% CI    | N of events/ Total N | HR   | 95% CI    |                                                        |
| Bacterial infections                 | 35-40            | 736/27984            | 1    |           | 313/11921            | 1    |           |                                                        |
|                                      | $\geq 55$        | 68/1889              | 1.36 | 1.11-1.85 | 34/858               | 1.35 | 0.99-2.04 | 0.94                                                   |
| Diabetes                             | 35-40            | 1369/27779           | 1    |           | 773/11726            | 1    |           |                                                        |
|                                      | $\geq 55$        | 108/1872             | 1.11 | 0.99-1.48 | 71/843               | 1.08 | 0.91-1.50 | 0.99                                                   |
| Epilepsy                             | 35-40            | 145/27770            | 1    |           | 70/11860             | 1    |           |                                                        |
|                                      | $\geq 55$        | 17/1878              | 1.74 | 1.07-3.02 | 8/855                | 1.30 | 0.65-2.95 | 0.70                                                   |
| Sleep disorders                      | 35-40            | 748/27984            | 1    |           | 215/11921            | 1    |           |                                                        |
|                                      | $\geq 55$        | 69/1889              | 1.28 | 1.02-1.70 | 25/858               | 1.29 | 0.86-2.02 | 0.59                                                   |
| Rheumatoid arthritis and related     | 35-40            | 652/27687            | 1    |           | 220/11711            | 1    |           |                                                        |
|                                      | $\geq 55$        | 51/1872              | 1.58 | 1.26-2.25 | 18/846               | 1.26 | 0.78-2.08 | 0.53                                                   |
| Sciatica                             | 35-40            | 579/27984            | 1    |           | 139/11921            | 1    |           |                                                        |
|                                      | $\geq 55$        | 61/1889              | 1.48 | 1.18-2.04 | 20/858               | 1.84 | 1.18-3.11 | 0.46                                                   |
| Circulatory and respiratory symptoms | 35-40            | 538/27984            | 1    |           | 340/11921            | 1    |           |                                                        |
|                                      | $\geq 55$        | 68/1889              | 1.60 | 1.28-2.17 | 35/858               | 1.20 | 0.88-1.79 | 0.17                                                   |
| Falls                                | 35-40            | 1239/21883           | 1    |           | 554/9887             | 1    |           |                                                        |
|                                      | $\geq 55$        | 66/926               | 1.09 | 0.89-1.46 | 36/492               | 1.34 | 0.97-1.92 | 0.58                                                   |
| Cardiovascular death                 | 35-40            | 74/27984             | 1    |           | 70/11921             | 1    |           |                                                        |
|                                      | $\geq 55$        | 11/1889              | 1.49 | 0.77-2.87 | 14/858               | 1.88 | 1.04-3.43 | 0.59                                                   |

\* Diseases with statistically significant ( $p < 0.05$ ) association with working  $\geq 55$  h/week. Disease chapters were omitted, if specific disease(s) within the chapter had statistically significant association(s). Models adjusted for sex and SES.

**eTable 10.** Associations between selected diseases\* and long working hours (>54 h/wk). Models adjusted for sex, age, sex **and lifestyle factors** (alcohol, smoking, physical inactivity, and BMI). Follow-up until 65 years.

| <b>Disease</b>                       | <b>Work hours/week</b> | <b>N of events/<br/>Total N</b> | <b>HR</b> | <b>95% CI</b> |
|--------------------------------------|------------------------|---------------------------------|-----------|---------------|
| Bacterial infections                 | 35-40                  | 1049/39905                      | 1         |               |
|                                      | ≥55                    | 102/2747                        | 1.33      | 1.07-1.65     |
| Diabetes                             | 35-40                  | 2142/39505                      | 1         |               |
|                                      | ≥55                    | 179/2715                        | 1.02      | 0.86-1.20     |
| Epilepsy                             | 35-40                  | 215/39630                       | 1         |               |
|                                      | ≥55                    | 25/2733                         | 1.45      | 0.92-2.28     |
| Sleep disorders                      | 35-40                  | 963/39905                       | 1         |               |
|                                      | ≥55                    | 94/2747                         | 1.26      | 1.01-1.57     |
| Rheumatoid arthritis and related     | 35-40                  | 872/39398                       | 1         |               |
|                                      | ≥55                    | 69/2718                         | 1.49      | 1.14-1.93     |
| Sciatica                             | 35-40                  | 718/39905                       | 1         |               |
|                                      | ≥55                    | 81/2747                         | 1.63      | 1.27-2.07     |
| Circulatory and respiratory symptoms | 35-40                  | 878/39905                       | 1         |               |
|                                      | ≥55                    | 103/2747                        | 1.52      | 1.23-1.88     |
| Falls                                | 35-40                  | 1793/31770                      | 1         |               |
|                                      | ≥55                    | 102/1418                        | 1.21      | 0.98-1.50     |
| Cardiovascular death                 | 35-40                  | 144/39905                       | 1         |               |
|                                      | ≥55                    | 25/2747                         | 1.50      | 0.95-2.38     |

\* Diseases with statistically significant ( $p < 0.05$ ) association with working >54 h/week. Disease chapter was not shown, if specific disease(s) within the chapter had statistically significant association(s)

**eTable 11.** Associations between long working hours and multimorbidity (=having at least two of bacterial infections, diabetes, diseases of the musculoskeletal system, injury, or early cardiovascular death). Effect estimates are adjusted for sex, age, SES, and cohort.

| <b>Work hours/week</b> | <b>N (total)</b> | <b>N (event)</b> | <b>HR</b> | <b>95% CI</b> |
|------------------------|------------------|------------------|-----------|---------------|
| <35                    | 5140             | 240              | 0.95      | 0.83-1.09     |
| 35-40                  | 39505            | 2426             | 1         |               |
| 41-48                  | 9022             | 647              | 1.23      | 1.13-1.35     |
| 49-54                  | 2613             | 164              | 1.06      | 0.90-1.25     |
| ≥55                    | 218              | 2715             | 1.27      | 1.11-1.47     |

**eTable 12.** Associations between time-dependent long working hours and selected health outcomes (FPS 2000 and 2004; HeSSup 1998 and 2003). Effect estimates are adjusted for sex, age, SES, and cohort. Follow-up is until 65 years. Results from the main analysis (working hours measured at baseline) are provided for comparison.

| Disease                                | Work hours/week | Time-dependent longitudinally measured working hours |           | Working hours measured at baseline |           |
|----------------------------------------|-----------------|------------------------------------------------------|-----------|------------------------------------|-----------|
|                                        |                 | HR                                                   | 95% CI    | HR                                 | 95% CI    |
| Bacterial infections                   | 35-40           | 1                                                    |           | 1                                  |           |
|                                        | ≥55             | 1.28                                                 | 1.03-1.60 | 1.41                               | 1.03-1.74 |
| Diabetes                               | 35-40           | 1                                                    |           | 1                                  |           |
|                                        | ≥55             | 1.11                                                 | 0.95-1.30 | 1.18                               | 1.01-1.38 |
| Diseases of the musculoskeletal system | 35-40           | 1                                                    |           | 1                                  |           |
|                                        | ≥55             | 1.23                                                 | 1.13-1.34 | 1.15                               | 1.06-1.26 |
| Injury                                 | 35-40           | 1                                                    |           | 1                                  |           |
|                                        | ≥55             | 1.23                                                 | 1.11-1.37 | 1.22                               | 1.00-1.50 |
| Death                                  | 35-40           | 1                                                    |           | 1                                  |           |
|                                        | ≥55             | 1.07                                                 | 0.86-1.33 | 1.05                               | 0.75-1.47 |
| Cardiovascular death                   | 35-40           | 1                                                    |           | 1                                  |           |
|                                        | ≥55             | 1.71                                                 | 1.10-2.67 | 1.68                               | 1.08-2.61 |



**eTable 13.** Non-response\* among employees working long hours compared to those working standard hours? Data are from FPS surveys 2000 and 2004 and HeSSup surveys 1998 and 2003.

| <b>Survey 1</b>      | <b>Survey 2</b>               |          | <b>HR</b> | <b>95% CI</b> |
|----------------------|-------------------------------|----------|-----------|---------------|
| <b>Work hours/wk</b> | <b>Respondents/<br/>Total</b> | <b>%</b> |           |               |
| <35                  | 946/4115                      | 23       | 1.26      | 1.18-1.34     |
| 35-40                | 5953/32714                    | 18       | 1         |               |
| 41-48                | 1545/7646                     | 20       | 1.11      | 1.06-1.48     |
| 49-54                | 555/2231                      | 25       | 1.37      | 1.27-1.48     |
| ≥55                  | 585/2362                      | 25       | 1.36      | 1.26-1.47     |

**eTable 14.** Risk of disease\* among non-responders compared to respondents. Results are from the FPS study. Effect estimates are adjusted for sex, age, and SES.

| <b>Disease</b>                         | <b>Response</b> | <b>N<br/>(total)</b> | <b>N (disease<br/>cases)</b> | <b>HR</b> | <b>95% CI</b> |
|----------------------------------------|-----------------|----------------------|------------------------------|-----------|---------------|
| Bacterial infections                   | No              | 23048                | 697                          | 1.05      | 0.96-1.16     |
| Bacterial infections                   | Yes             | 47982                | 1334                         | 1         |               |
| Diabetes                               | No              | 22770                | 1490                         | 1.10      | 1.03-1.17     |
| Diabetes                               | Yes             | 47467                | 2651                         | 1         |               |
| Diseases of the musculoskeletal system | No              | 21198                | 4207                         | 1.01      | 0.97-1.05     |
| Diseases of the musculoskeletal system | Yes             | 44127                | 8757                         | 1         |               |
| Injury                                 | No              | 23048                | 2848                         | 1.06      | 1.01-1.11     |
| Injury                                 | Yes             | 47982                | 5162                         | 1         |               |
| Death from cardiovascular disease      | No              | 23048                | 143                          | 1.42      | 1.13-1.79     |
| Death from cardiovascular disease      | Yes             | 47982                | 167                          | 1         |               |
| Death                                  | No              | 23048                | 909                          | 1.34      | 1.23-1.46     |
| Death                                  | Yes             | 47982                | 1295                         | 1         |               |

\*Replicated outcomes only

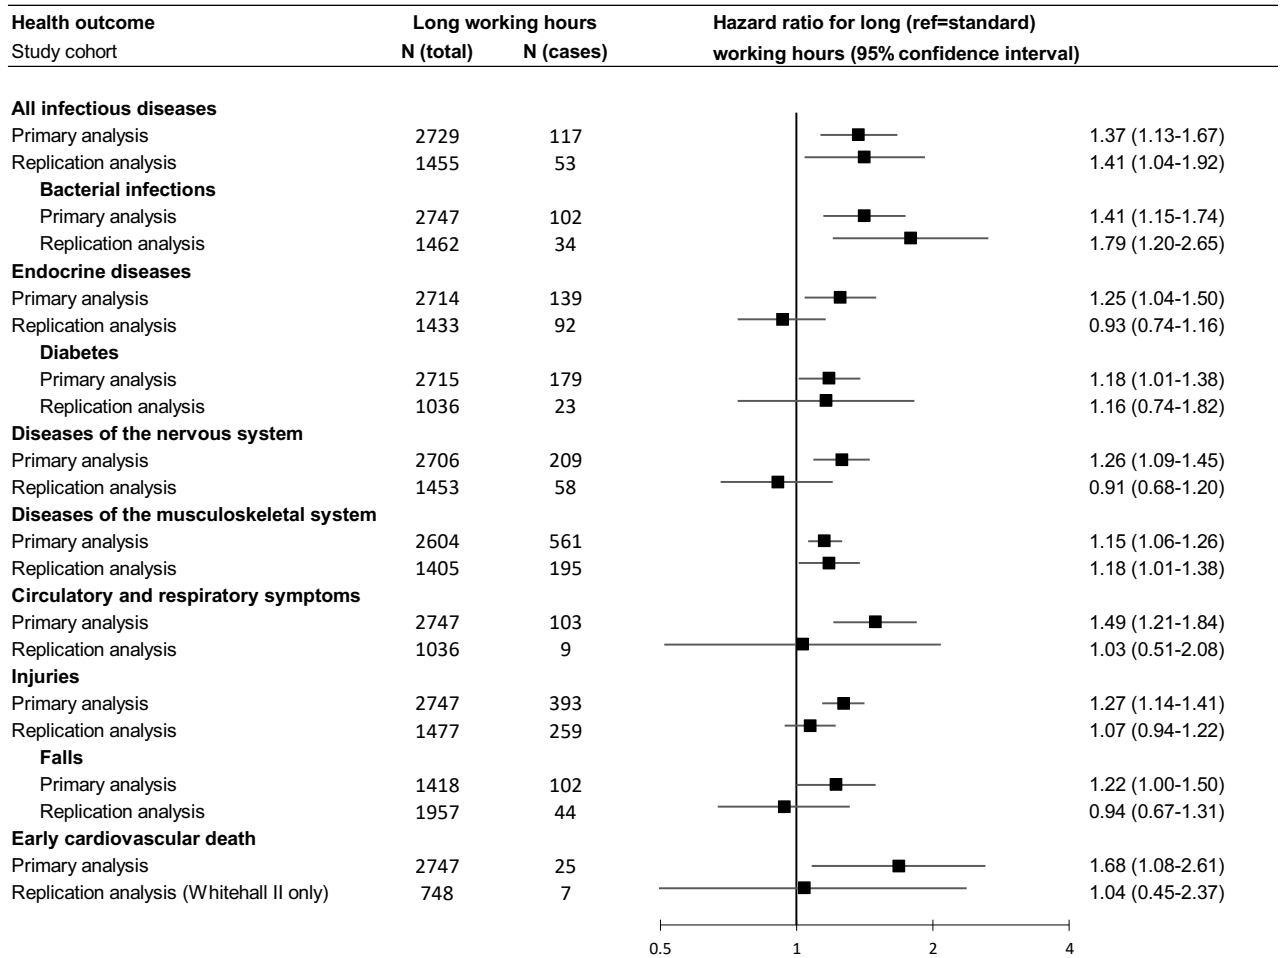

**eFigure 3.** Association between long working hours versus standard hours per week and selected\* diseases. Replication cohorts with response rate less than 70% are excluded. Replication cohorts included: Whitehall II, WOLF, DWEC00, PUMA.

\*Selected diseases were those with statistically significant ( $p < 0.05$ ) association with long working hours. ICD-10 disease chapters instead of specific diseases are shown if the replication cohorts had less than 20 events per specific disease among participants working long hours. Models adjusted for age, sex, socioeconomic status and cohort.

**eTable 15.** Association between onset of disease related to long working hours and reduction in subsequent working hours among participants with long working hours at baseline. Effect estimates are adjusted for sex, age, SES and cohort. *P for interaction 'sex × disease onset' = 0.0316*

|       | Onset of a disease between surveys at Time1 and Time2 | Participants who worked long hours both at Time1 and Time2<br><br>% (N of events/N total) | RR   | 95% CI    |
|-------|-------------------------------------------------------|-------------------------------------------------------------------------------------------|------|-----------|
| All   | No                                                    | 31% (380/1225)                                                                            | 1    |           |
|       | Yes                                                   | 29% (53/183)                                                                              | 1.15 | 0.90-1.47 |
| Men   | No                                                    | 36% (239/667)                                                                             | 1    |           |
|       | Yes                                                   | 38% (43/114)                                                                              | 0.98 | 0.76-1.27 |
| Women | No                                                    | 25% (141/558)                                                                             | 1    |           |
|       | Yes                                                   | 14% (10/69)                                                                               | 2.00 | 1.10-3.57 |

## Web appendix 7: Sensitivity analysis with maximum follow-up

**eTable 16.** Age-, sex-, socioeconomic status- and cohort-adjusted hazard ratios for long (>55 h/wk) versus regular (35-40 h/wk) working hours at baseline in relation to risk of disease or death in sensitivity analysis with maximum follow-up

| ICD-10 disease chapter (in bold) and disease endpoint | N (total)† | N (cases) | HR    | 95% CI    |
|-------------------------------------------------------|------------|-----------|-------|-----------|
| <b>1. Infections</b>                                  | 59154      | 2216      | 1.37* | 1.14-1.65 |
| 2. Bacterial infections                               | 59599      | 1959      | 1.41* | 1.16-1.71 |
| <b>3. Cancer</b>                                      | 59065      | 4408      | 1.02  | 0.88-1.19 |
| 4. Melanoma                                           | 59552      | 881       | 0.95  | 0.67-1.35 |
| 5. Breast cancer                                      | 43761      | 1889      | 1.21  | 0.95-1.53 |
| 6. Prostate cancer                                    | 15504      | 419       | 1.52  | 1.10-2.09 |
| 7. Leukaemia, lymphoma                                | 59538      | 453       | 1.23  | 0.81-1.87 |
| <b>8. Endocrine diseases</b>                          | 59089      | 2073      | 1.18  | 0.98-1.41 |
| 9. Diabetes                                           | 58995      | 3859      | 1.12  | 0.97-1.30 |
| <b>10. Mental and behavioural disorders</b>           | 59268      | 1369      | 0.84  | 0.65-1.10 |
| 11. Disorders due to substance abuse                  | 59599      | 406       | 0.89  | 0.58-1.37 |
| 12. Mood disorders                                    | 59439      | 689       | 0.92  | 0.63-1.34 |
| <b>13. Diseases of the nervous system</b>             | 58618      | 4269      | 1.21* | 1.06-1.40 |
| 14. Epilepsy                                          | 59205      | 410       | 1.48  | 0.99-2.23 |
| 15. TIA                                               | 59570      | 564       | 1.15  | 0.78-1.70 |
| 16. Sleep disorders                                   | 59599      | 1740      | 1.28  | 1.40-1.58 |
| <b>17. Diseases of the eye</b>                        | 59205      | 3965      | 0.85  | 0.72-1.01 |
| <b>18. Diseases of the ear</b>                        | 59306      | 812       | 1.17  | 0.85-1.62 |
| <b>19. Diseases of the circulatory system</b>         | 57444      | 7178      | 1.09  | 0.98-1.22 |
| 20. Hypertension                                      | 55800      | 4768      | 1.06  | 0.92-1.21 |
| 21. Ischemic heart diseases                           | 59222      | 1993      | 1.11  | 0.91-1.34 |
| 22. Angina pectoris                                   | 59304      | 874       | 1.35  | 1.04-1.77 |
| 23. Myocardial infarction                             | 59542      | 660       | 1.08  | 0.77-1.50 |
| 24. Arrhythmias                                       | 59335      | 2689      | 1.14  | 0.70-2.02 |
| 25. Cerebrovascular diseases                          | 59521      | 1005      | 1.17  | 0.89-1.54 |
| 26. Stroke                                            | 59540      | 853       | 1.19  | 0.88-1.59 |
| 27. Cerebral infarction                               | 59571      | 569       | 1.30  | 0.92-1.83 |
| <b>28. Diseases of the respiratory system</b>         | 57683      | 4572      | 0.95  | 0.83-1.10 |
| 29. Influenza and pneumonia                           | 59599      | 1570      | 0.99  | 0.78-1.27 |
| 30. Asthma                                            | 57522      | 2359      | 1.08  | 0.88-1.33 |
| <b>31. Diseases of the digestive system</b>           | 57466      | 7894      | 1.04  | 0.94-1.15 |
| 32. Appendicitis                                      | 59599      | 896       | 0.99  | 0.72-1.36 |
| 33. Diseases of liver                                 | 59599      | 533       | 1.28  | 0.87-1.89 |
| <b>34. Diseases of the skin</b>                       | 59334      | 807       | 1.10  | 0.80-1.51 |
| <b>35. Diseases of the musculoskeletal system</b>     | 55669      | 10969     | 1.16* | 1.07-1.26 |
| 36. Rheumatoid arthritis and related disorders        | 58825      | 1483      | 1.47* | 1.16-1.86 |
| 37. Osteoarthritis                                    | 59599      | 4282      | 1.11  | 0.96-1.29 |
| 38. Sciatica                                          | 59599      | 1159      | 1.59* | 1.26-2.02 |
| 39. Back pain                                         | 59599      | 520       | 1.31  | 0.89-1.91 |
| 40. Soft tissue disorders                             | 59599      | 4032      | 1.10  | 0.95-1.27 |

|                                                 |       |      |       |           |
|-------------------------------------------------|-------|------|-------|-----------|
| <b>41. Diseases of the genitourinary system</b> | 56470 | 8046 | 1.03  | 0.92-1.16 |
| <b>42. Pregnancy complications</b>              | 43116 | 109  | 1.01  | 0.72-1.41 |
| 43. Circulatory and respiratory symptoms        | 59599 | 1565 | 1.45* | 1.19-1.78 |
| 44. Digestive and abdominal symptoms            | 59599 | 1615 | 1.18  | 0.93-1.50 |
| <b>45. Injury</b>                               | 59599 | 7186 | 1.25* | 1.13-1.38 |
| 46. Falls                                       | 44635 | 3019 | 1.22  | 1.01-1.47 |
| <b>47. Overall mortality</b>                    | 59599 | 2567 | 1.01  | 0.84-1.20 |
| 48. Death, cancer                               | 59599 | 1296 | 0.85  | 0.64-1.13 |
| 49. Death, cardiovascular                       | 59599 | 357  | 1.50  | 1.02-2.21 |
| 50. Death, other reason                         | 59599 | 914  | 0.99  | 0.75-1.13 |

\*Statistically significant after adjustment for False Discovery Rate of 5%.  
For clarity, significant associations are highlighted.

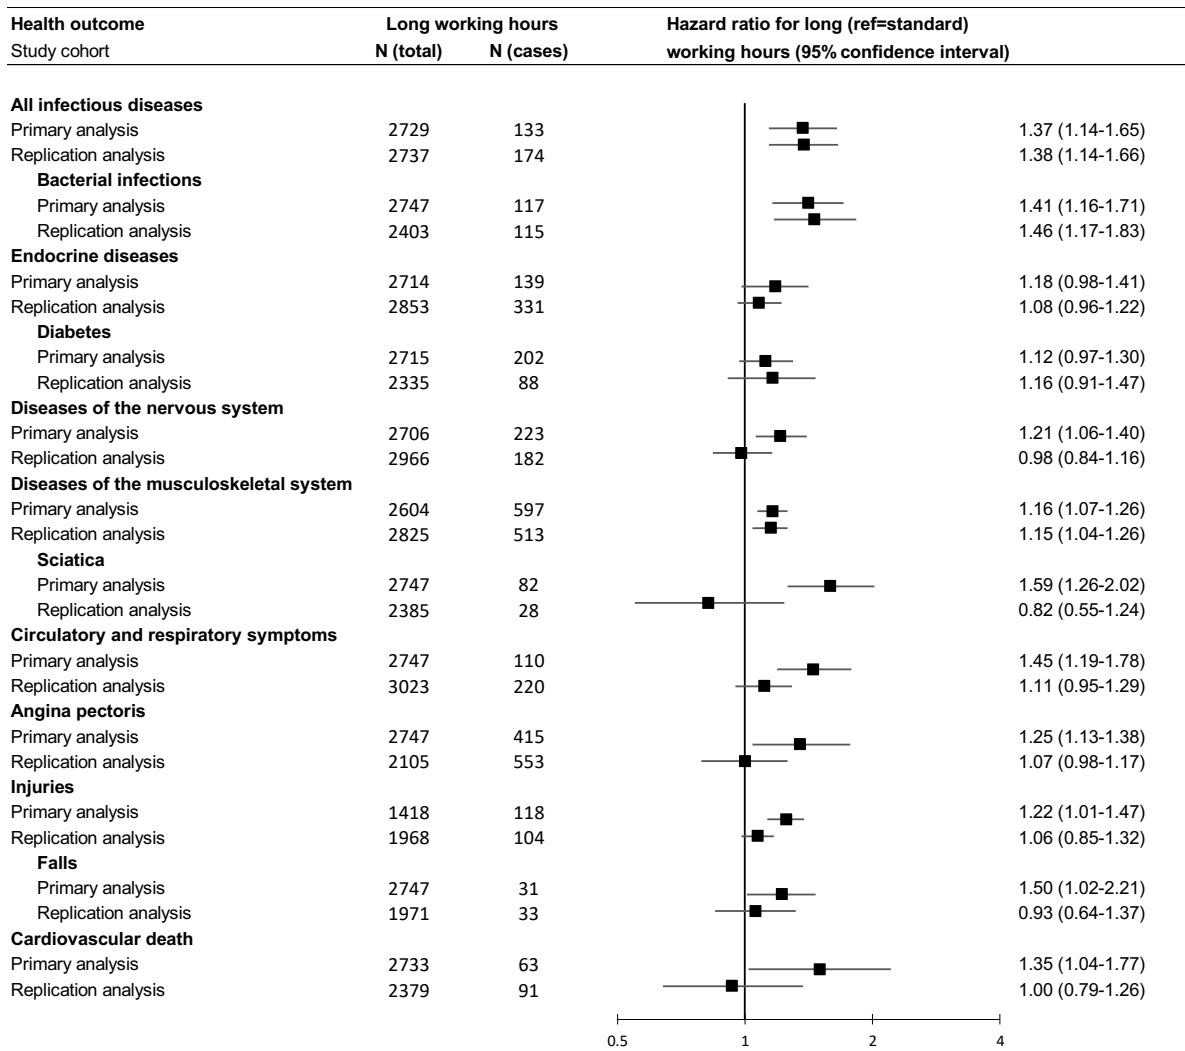

**eFigure 4.** Association between long working hours versus standard hours per week and selected\* diseases with maximum follow-up in primary and replication analyses.

\*Selected diseases were those with statistically significant ( $p < 0.05$ ) association with long working hours. ICD-10 disease chapters instead of specific diseases are shown if the replication cohorts had less than 20 events per specific disease among participants working long hours. Models adjusted for age, sex, socioeconomic status and cohort.
